# Supplementary material for: Spin–orbit coupling in low-lying electronic states of CuH
Source: Royal Society of Chemistry journal article supplement (doi:10.1039/d3cp02869k), 2023-01-01
Supplement: d3cp02869k1.pdf [file d3cp02869k1.pdf]

## *Supplementary Material*

# **Spin-orbit coupling in low-lying electronic states of CuH**

Zeinab Mohammadian, Alireza Shayesteh\*

*School of Chemistry, College of Science, University of Tehran, Tehran, 14176, Iran*

\* Corresponding author. Email address: ashayesteh@ut.ac.ir

### Contents:

1. Calculated spectroscopic constants of CuH using different active orbitals, Electronic states of CuH, MRCI potential energy curves, spin-orbit matrix elements, SOC potential energy curves, eigenvalues and eigenvectors of vibronic spin-orbit Hamiltonian matrices for CuH and CuD, vibrational energy levels, spin-orbit matrix elements between vibrational levels, transition dipole moments, Einstein  $A$  coefficients (Tables S1 to S33).
2. The differences in vibronic energies calculated by two different SOC methods (Figures S1 and S2).

**Table S1**

Calculated spectroscopic constants (in  $\text{cm}^{-1}$ ) for the ground and excited  $\Omega$  states of CuH using an active space of 11 electrons in 7 orbitals. Experimental values are from references [8] and [17].

| State ( $\Omega$ )                | Composition at $r = 1.46$ (Å)                              | $r_e$ (Å)    | $T_e$ ( $\text{cm}^{-1}$ ) | $D_e$ ( $\text{cm}^{-1}$ ) | $\omega_e$ ( $\text{cm}^{-1}$ ) | $v_{0-0}$ ( $\text{cm}^{-1}$ ) | $\Delta G_{1/2}$ ( $\text{cm}^{-1}$ ) | $B_e$ ( $\text{cm}^{-1}$ ) |
|-----------------------------------|------------------------------------------------------------|--------------|----------------------------|----------------------------|---------------------------------|--------------------------------|---------------------------------------|----------------------------|
| $0^+$ (I)                         | $X^1\Sigma^+(100)$                                         | 1.459        | 0                          | 21531                      | 1927                            | 0                              | 1850                                  | 7.984                      |
| <b>Exp. <math>0^+</math>(I)</b>   | <b><math>X^1\Sigma^+</math></b>                            | <b>1.463</b> | <b>0</b>                   | <b>22980</b>               | <b>1941</b>                     | <b>0</b>                       | <b>1866.41</b>                        | <b>7.945</b>               |
| $0^-$ (I)                         | $1^3\Sigma^+(98) + 1^3\Pi(2)$                              | 1.519        | 18313                      | 3218                       | 1832                            | 18254                          | 1741                                  | 7.365                      |
| 1(I)                              | $1^3\Sigma^+(99) + 1^1\Pi(1)$                              | 1.519        | 18328                      | 3203                       | 1834                            | 18269                          | 1743                                  | 7.365                      |
| $0^+$ (II)                        | $A^1\Sigma^+(94) + 1^3\Pi(6)$                              | 1.556        | 21889                      | 11204                      | 1757                            | 21795                          | 1673                                  | 7.019                      |
| <b>Exp. <math>0^+</math>(II)</b>  | <b><math>A^1\Sigma^+</math></b>                            | <b>1.572</b> | <b>23434.2</b>             | <b>10748</b>               | <b>1698</b>                     | <b>23311.1</b>                 | <b>1610.4</b>                         | <b>6.874</b>               |
| 2(I)                              | $1^3\Pi(87) + 1^3\Delta(12) + 1^1\Delta(1)$                | 1.604        | 23314                      | 9812                       | 1689                            | 23183                          | 1610                                  | 6.605                      |
| 1(II)                             | $1^3\Pi(80) + 1^1\Pi(6) + 1^3\Delta(14)$                   | 1.604        | 23691                      | 9441                       | 1685                            | 23558                          | 1604                                  | 6.605                      |
| 3(I)                              | $1^3\Delta(100)$                                           | 1.591        | 24084                      | 9042                       | 1653                            | 23931                          | 1557                                  | 6.714                      |
| 2(II)                             | $1^3\Delta(66) + 1^1\Delta(28) + 1^3\Pi(6)$                | 1.591        | 24530                      | 8602                       | 1655                            | 24377                          | 1557                                  | 6.714                      |
| $0^-$ (II)                        | $1^3\Sigma^+(1) + 1^3\Pi(99)$                              | 1.603        | 24508                      | 10642                      | 1700                            | 24382                          | 1616                                  | 6.614                      |
| $0^+$ (III)                       | $A^1\Sigma^+(6) + 1^3\Pi(94)$                              | 1.598        | 24684                      | 10466                      | 1724                            | 24573                          | 1647                                  | 6.655                      |
| <b>Exp. <math>0^+</math>(III)</b> | <b><math>B^3\Pi_{0+}</math></b>                            | <b>1.607</b> | <b>26420.9</b>             | <b>9805</b>                | <b>1670</b>                     | <b>26281.7</b>                 | <b>1567.3</b>                         | <b>6.582</b>               |
| 1(III)                            | $1^3\Delta(64) + 1^3\Pi(19) + 1^1\Pi(15) + 1^3\Sigma^+(2)$ | 1.602        | 25633                      | 9517                       | 1614                            | 25473                          | 1549                                  | 6.622                      |
| <b>Exp. 1(III)</b>                | <b>C1</b>                                                  | <b>1.610</b> | <b>27270.4</b>             | <b>6912</b>                | <b>1627</b>                     | <b>27101.3</b>                 | <b>1455.3</b>                         | <b>6.553</b>               |
| 1(IV)                             | $1^1\Pi(78) + 1^3\Delta(21) + 1^3\Sigma^+(1)$              | 1.609        | 26495                      | 8675                       | 1659                            | 26348                          | 1569                                  | 6.564                      |
| <b>Exp. 1(IV)</b>                 | <b>c1</b>                                                  | <b>1.626</b> | <b>28161</b>               | <b>8064</b>                |                                 | <b>27957.5</b>                 | <b>1388.7</b>                         | <b>6.43</b>                |
| 2(III)                            | $1^1\Delta(70) + 1^3\Delta(22) + 1^3\Pi(8)$                | 1.591        | 26684                      | 8486                       | 1654                            | 26530                          | 1551                                  | 6.714                      |
| <b>Exp. 2(III)</b>                | <b><math>b\Delta_2</math></b>                              | <b>1.59</b>  | <b>28470</b>               | <b>7755</b>                |                                 |                                | <b>1475</b>                           | <b>6.7</b>                 |
| $0^-$ (III)                       | $2^3\Sigma^+(100)$                                         | 2.100        | 28260                      | 4833                       | 2041                            | 28391                          | 1591                                  | 3.854                      |
| 1(V)                              | $2^3\Sigma^+(100)$                                         | 2.088        | 28239                      | 4855                       | 2185                            | 28259                          | 1677                                  | 3.898                      |

**Table S2**

Molecular states of CuH resulting from atomic states of Cu and H.

| Atomic states                | Molecular states                                                                                                        |
|------------------------------|-------------------------------------------------------------------------------------------------------------------------|
| Cu ( $^2S$ ) + H ( $^2S$ )   | $^1\Sigma^+$ , $^3\Sigma^+$                                                                                             |
| Cu ( $^2D$ ) + H ( $^2S$ )   | $^1\Sigma^+$ , $^3\Sigma^+$ , $^1\Pi$ , $^3\Pi$ , $^1\Delta$ , $^3\Delta$                                               |
| Cu ( $^2P^o$ ) + H ( $^2S$ ) | $^1\Sigma^+$ , $^3\Sigma^+$ , $^1\Pi$ , $^3\Pi$                                                                         |
| Cu ( $^4P^o$ ) + H ( $^2S$ ) | $^3\Sigma^+$ , $^5\Sigma^+$ , $^3\Pi$ , $^5\Pi$                                                                         |
| Cu ( $^4D^o$ ) + H ( $^2S$ ) | $^3\Sigma^-$ , $^5\Sigma^-$ , $^3\Pi$ , $^5\Pi$ , $^3\Delta$ , $^5\Delta$                                               |
| Cu ( $^2D^o$ ) + H ( $^2S$ ) | $^1\Sigma^-(2)$ , $^3\Sigma^-(2)$ , $^1\Pi(2)$ , $^3\Pi(2)$ , $^1\Delta(2)$ , $^3\Delta(2)$                             |
| Cu ( $^2F^o$ ) + H ( $^2S$ ) | $^1\Sigma^+(2)$ , $^3\Sigma^+(2)$ , $^1\Pi(2)$ , $^3\Pi(2)$ , $^1\Delta(2)$ , $^3\Delta(2)$ , $^1\Phi(2)$ , $^3\Phi(2)$ |
| Cu ( $^4F^o$ ) + H ( $^2S$ ) | $^3\Sigma^+$ , $^5\Sigma^+$ , $^3\Pi$ , $^5\Pi$ , $^3\Delta$ , $^5\Delta$ , $^3\Phi$ , $^5\Phi$                         |

**Table S3**

Calculated spectroscopic constants (in  $\text{cm}^{-1}$ ) for the ground and excited  $\Omega$  states of CuH using an active space of 11 electrons in 10 orbitals. Experimental values are from references [8] and [17].

| State ( $\Omega$ )             | Composition at<br>$r = 1.46$ ( $\text{\AA}$ )                   | $r_e$ ( $\text{\AA}$ ) | $T_e$ ( $\text{cm}^{-1}$ ) | $D_e$ ( $\text{cm}^{-1}$ ) | $\omega_e$ ( $\text{cm}^{-1}$ ) | $\nu_{0-0}$ ( $\text{cm}^{-1}$ ) | $\Delta G_{1/2}$ ( $\text{cm}^{-1}$ ) | $B_e$ ( $\text{cm}^{-1}$ ) |
|--------------------------------|-----------------------------------------------------------------|------------------------|----------------------------|----------------------------|---------------------------------|----------------------------------|---------------------------------------|----------------------------|
| 0 <sup>+</sup> (I)             | $X^1\Sigma^+(100)$                                              | 1.439                  | 0                          | 21870                      | 1960                            | 0                                | 1875                                  | 8.207                      |
| <b>Exp. 0<sup>+</sup>(I)</b>   | <b><math>X^1\Sigma^+</math></b>                                 | <b>1.463</b>           | <b>0</b>                   | <b>22980</b>               | <b>1941</b>                     | <b>0</b>                         | <b>1866.41</b>                        | <b>7.945</b>               |
| 0 <sup>-</sup> (I)             | $1^3\Sigma^+(98) + 1^3\Pi(2)$                                   | 1.520                  | 18297                      | 3565                       | 1794                            | 18219                            | 1711                                  | 7.356                      |
| 1(I)                           | $1^3\Sigma^+(99) + 1^1\Pi(1)$                                   | 1.519                  | 18315                      | 3548                       | 1796                            | 18238                            | 1713                                  | 7.365                      |
| 0 <sup>+</sup> (II)            | $A^1\Sigma^+(92) + 1^3\Pi(8)$                                   | 1.559                  | 21592                      | 9948                       | 1706                            | 21458                            | 1608                                  | 6.992                      |
| <b>Exp. 0<sup>+</sup>(II)</b>  | <b><math>A^1\Sigma^+</math></b>                                 | <b>1.572</b>           | <b>23434.2</b>             | <b>10748</b>               | <b>1698</b>                     | <b>23311.1</b>                   | <b>1610.4</b>                         | <b>6.874</b>               |
| 2(I)                           | $1^3\Pi(87) + 1^3\Delta(12)$<br>$+ 1^1\Delta(1)$                | 1.610                  | 22649                      | 8920                       | 1649                            | 22495                            | 1548                                  | 6.556                      |
| 1(II)                          | $1^3\Pi(80) + 1^1\Pi(6) + 1^3\Delta$<br>(14)                    | 1.610                  | 23033                      | 8542                       | 1650                            | 22877                            | 1543                                  | 6.556                      |
| 3(I)                           | $1^3\Delta(100)$                                                | 1.598                  | 23449                      | 8132                       | 1608                            | 23272                            | 1498                                  | 6.655                      |
| 2(II)                          | $1^3\Delta(69) + 1^1\Delta(25)$<br>$+ 1^3\Pi(6)$                | 1.599                  | 23929                      | 7651                       | 1607                            | 23751                            | 1493                                  | 6.647                      |
| 0 <sup>-</sup> (II)            | $1^3\Sigma^+(1) + 1^3\Pi(99)$                                   | 1.608                  | 23858                      | 9754                       | 1657                            | 23711                            | 1560                                  | 6.537                      |
| 0 <sup>+</sup> (III)           | $A^1\Sigma^+(8) + 1^3\Pi(92)$                                   | 1.604                  | 24066                      | 9530                       | 1698                            | 23933                            | 1597                                  | 6.605                      |
| <b>Exp. 0<sup>+</sup>(III)</b> | <b><math>B^3\Pi_{0+}</math></b>                                 | <b>1.607</b>           | <b>26420.9</b>             | <b>9805</b>                | <b>1670</b>                     | <b>26281.7</b>                   | <b>1567.3</b>                         | <b>6.582</b>               |
| 1(III)                         | $1^3\Delta(64) + 1^3\Pi(19)$<br>$+ 1^1\Pi(15) + 1^3\Sigma^+(2)$ | 1.608                  | 24996                      | 8610                       | 1595                            | 24813                            | 1480                                  | 6.573                      |
| <b>Exp. 1(III)</b>             | <b>C1</b>                                                       | <b>1.610</b>           | <b>27270.4</b>             | <b>6912</b>                | <b>1627</b>                     | <b>27101.3</b>                   | <b>1455.3</b>                         | <b>6.553</b>               |
| 1(IV)                          | $1^1\Pi(78) + 1^3\Delta(21)$<br>$+ 1^3\Sigma^+(1)$              | 1.615                  | 25860                      | 7762                       | 1600                            | 25685                            | 1498                                  | 6.516                      |
| <b>Exp. 1(IV)</b>              | <b>c1</b>                                                       | <b>1.626</b>           | <b>28161</b>               | <b>8064</b>                |                                 | <b>27957.5</b>                   | <b>1388.7</b>                         | <b>6.43</b>                |
| 2(III)                         | $1^1\Delta(73) + 1^3\Delta(20)$<br>$+ 1^3\Pi(7)$                | 1.601                  | 26147                      | 7469                       | 1596                            | 25962                            | 1476                                  | 6.630                      |
| <b>Exp. 2(III)</b>             | <b><math>b\Delta_2</math></b>                                   | <b>1.59</b>            | <b>28470</b>               | <b>7755</b>                |                                 |                                  | <b>1475</b>                           | <b>6.7</b>                 |
| 0 <sup>-</sup> (III)           | $2^3\Sigma^+(100)$                                              | 2.179                  | 27140                      | 4425                       | 2137                            | 27194                            | 1556                                  | 3.579                      |
| 1(V)                           | $2^3\Sigma^+(100)$                                              | 2.187                  | 27183                      | 4377                       | 2090                            | 27255                            | 1527                                  | 3.553                      |

**Table S4**

MRCI potential energy curves (in  $\text{cm}^{-1}$ ) for the ground and low-lying excited states of CuH using the largest active space that included the 3d, 3d' and 4p<sub>z</sub> orbitals of copper.

| $r$ (Å) | $X^1\Sigma^+$ | $A^1\Sigma^+$ | $1^3\Sigma^+$ | $2^3\Sigma^+$ | $1^1\Delta$ | $1^3\Delta$ | $1^1\Pi$ | $1^3\Pi$ |
|---------|---------------|---------------|---------------|---------------|-------------|-------------|----------|----------|
| 1.00    | 26982.09      | 58697.99      | 51895.59      | 95024.99      | 67121.29    | 66104.79    | 72152.33 | 69555.73 |
| 1.05    | 19407.28      | 49825.28      | 43475.68      | 83110.38      | 57572.78    | 56490.68    | 61691.66 | 59130.56 |
| 1.10    | 13570.84      | 42887.74      | 36901.74      | 73408.04      | 50028.54    | 48906.94    | 53343.32 | 50843.12 |
| 1.15    | 9152.51       | 37447.41      | 31803.91      | 65500.31      | 44084.01    | 42932.81    | 46726.75 | 44276.25 |
| 1.20    | 5882.34       | 33242.34      | 27897.84      | 59038.44      | 39434.34    | 38262.44    | 41523.34 | 39122.74 |
| 1.25    | 3519.67       | 30029.37      | 24950.57      | 53741.57      | 35846.17    | 34656.27    | 37462.40 | 35110.70 |
| 1.30    | 1877.45       | 27631.95      | 22790.15      | 49406.95      | 33117.55    | 31916.15    | 34340.32 | 32034.92 |
| 1.35    | 822.95        | 25890.65      | 21258.55      | 45848.65      | 31087.45    | 29869.75    | 31984.45 | 29272.95 |
| 1.40    | 232.52        | 24639.92      | 20232.62      | 42919.12      | 29620.12    | 28394.92    | 30243.41 | 28041.71 |
| 1.45    | 8.30          | 23900.40      | 19618.40      | 40499.80      | 28611.00    | 27386.20    | 29019.63 | 26860.93 |
| 1.46    | 0.00          | 23714.20      | 19536.60      | 40067.40      | 28455.30    | 27230.80    | 28824.82 | 26676.82 |
| 1.47    | 4.85          | 23719.25      | 19467.75      | 39653.35      | 28314.25    | 27088.45    | 28647.85 | 26509.65 |
| 1.50    | 79.86         | 23512.66      | 19331.36      | 38502.66      | 27976.46    | 26747.26    | 28199.03 | 26094.13 |
| 1.55    | 388.74        | 23387.54      | 19301.14      | 36854.84      | 27633.24    | 26406.94    | 27712.35 | 25654.55 |
| 1.60    | 870.69        | 23485.39      | 19467.29      | 35363.59      | 27525.99    | 26303.19    | 27492.76 | 25486.86 |
| 1.65    | 1493.76       | 23754.26      | 19782.46      | 34337.16      | 27604.76    | 26371.36    | 27482.78 | 25533.38 |
| 1.70    | 2217.41       | 24162.81      | 20206.21      | 33395.31      | 27823.71    | 26626.21    | 27634.18 | 25740.78 |
| 1.75    | 3007.64       | 24673.14      | 20702.74      | 32625.44      | 28151.14    | 26956.04    | 27916.77 | 26086.07 |
| 1.80    | 3869.62       | 25249.92      | 21250.72      | 32015.82      | 28562.72    | 27383.92    | 28283.46 | 26516.66 |
| 1.90    | 5677.37       | 26605.77      | 22371.37      | 31172.67      | 29515.77    | 28383.77    | 29201.01 | 27558.71 |
| 2.00    | 7520.41       | 27987.21      | 23296.81      | 30825.31      | 30510.21    | 29451.81    | 30223.32 | 28750.52 |
| 2.10    | 9327.20       | 29322.20      | 23776.10      | 30907.10      | 31457.30    | 30498.50    | 31212.16 | 29912.06 |
| 2.20    | 11048.76      | 30532.96      | 24010.46      | 31303.06      | 32286.76    | 31437.36    | 32095.89 | 30985.79 |
| 2.30    | 12655.81      | 31565.61      | 23945.91      | 31907.51      | 32956.21    | 32230.41    | 32832.96 | 31911.86 |
| 2.40    | 14123.99      | 32390.39      | 23749.99      | 32503.09      | 33458.09    | 32856.99    | 33408.04 | 32662.24 |
| 2.50    | 15439.56      | 33017.86      | 23581.56      | 33057.56      | 33815.96    | 33327.86    | 33818.67 | 33241.97 |
| 2.60    | 16600.54      | 33456.34      | 23477.24      | 33336.74      | 34054.24    | 33667.64    | 34102.40 | 33662.40 |
| 2.70    | 17603.07      | 33732.67      | 23230.37      | 33661.67      | 34218.57    | 33922.37    | 34289.41 | 33946.91 |
| 2.80    | 18460.91      | 33913.71      | 23103.61      | 33834.41      | 34306.41    | 34082.21    | 34405.76 | 34155.06 |
| 2.90    | 19192.26      | 34039.86      | 22952.56      | 33985.66      | 34353.46    | 34186.56    | 34477.79 | 34288.49 |
| 3.00    | 19803.93      | 34115.23      | 22838.43      | 34078.13      | 34374.63    | 34248.83    | 34514.04 | 34380.34 |
| 3.20    | 20735.81      | 34222.21      | 22664.51      | 34184.91      | 34409.61    | 34341.01    | 34548.96 | 34484.16 |
| 3.40    | 21331.10      | 34258.50      | 22546.50      | 34247.10      | 34418.30    | 34389.50    | 34544.57 | 34514.67 |
| 3.60    | 21698.25      | 34274.65      | 22466.05      | 34264.15      | 34408.15    | 34403.65    | 34540.52 | 34533.32 |
| 3.80    | 21933.87      | 34265.97      | 22411.37      | 34266.37      | 34399.37    | 34407.07    | 34533.86 | 34537.96 |
| 4.00    | 22077.60      | 34261.30      | 22379.00      | 34273.60      | 34391.60    | 34412.20    | 34531.10 | 34540.90 |
| 4.50    | 22242.33      | 34251.53      | 22341.53      | 34272.83      | 34385.13    | 34414.23    | 34523.40 | 34538.00 |
| 5.00    | 22293.39      | 34262.99      | 22335.89      | 34288.09      | 34395.99    | 34426.59    | 34528.96 | 34544.66 |
| 5.50    | 22305.86      | 34260.76      | 22334.36      | 34288.56      | 34394.26    | 34424.46    | 34528.34 | 34546.44 |
| 6.00    | 22310.89      | 34258.59      | 22331.89      | 34283.89      | 34390.99    | 34417.59    | 34528.31 | 34546.21 |
| 6.50    | 22309.29      | 34253.99      | 22328.79      | 34278.89      | 34389.79    | 34414.89    | 34529.55 | 34545.05 |
| 7.00    | 22305.02      | 34247.52      | 22323.52      | 34274.42      | 34381.52    | 34408.32    | 34523.89 | 34540.99 |
| 7.50    | 22307.63      | 34250.43      | 22327.33      | 34276.93      | 34383.63    | 34411.13    | 34523.89 | 34540.99 |
| 8.00    | 22308.24      | 34254.24      | 22327.64      | 34280.14      | 34386.74    | 34414.14    | 34529.24 | 34545.14 |
| 8.50    | 22308.28      | 34254.68      | 22327.88      | 34279.38      | 34386.78    | 34415.58    | 34529.02 | 34544.22 |
| 9.00    | 22308.50      | 34256.80      | 22327.70      | 34280.30      | 34388.30    | 34414.50    | 34529.29 | 34542.99 |

**Table S5**

Spin-orbit matrix elements (in  $\text{cm}^{-1}$ ) for the ground and excited states of CuH.

| $r$ (Å) | $\langle {}^1\Delta   \hat{\mathbf{H}}_{\text{so}}   {}^1\Delta \rangle$ | $\langle {}^1\Pi   \hat{\mathbf{H}}_{\text{so}}   {}^1\Pi \rangle$ | $\langle {}^1\Sigma_0^+   \hat{\mathbf{H}}_{\text{so}}   {}^1\Pi_0 \rangle$ | $\langle {}^1\Sigma_1^+   \hat{\mathbf{H}}_{\text{so}}   {}^1\Pi_1 \rangle$ | $\langle {}^1\Delta   \hat{\mathbf{H}}_{\text{so}}   {}^1\Pi \rangle$ | $\langle {}^1\Delta   \hat{\mathbf{H}}_{\text{so}}   {}^1\Pi \rangle$ | $\langle {}^2\Sigma_0^+   \hat{\mathbf{H}}_{\text{so}}   {}^1\Pi_0 \rangle$ |
|---------|--------------------------------------------------------------------------|--------------------------------------------------------------------|-----------------------------------------------------------------------------|-----------------------------------------------------------------------------|-----------------------------------------------------------------------|-----------------------------------------------------------------------|-----------------------------------------------------------------------------|
| 1.00    | -831.75                                                                  | -414.07                                                            | -647.97                                                                     | -456.82                                                                     | -582.64                                                               | -587.57                                                               | -713.94                                                                     |
| 1.05    | -830.12                                                                  | -413.26                                                            | -689.70                                                                     | -486.24                                                                     | -582.21                                                               | -586.89                                                               | -676.95                                                                     |
| 1.10    | -828.69                                                                  | -412.64                                                            | -726.09                                                                     | -511.89                                                                     | -581.84                                                               | -586.29                                                               | -642.08                                                                     |
| 1.15    | -827.47                                                                  | -412.21                                                            | -757.66                                                                     | -534.15                                                                     | -581.46                                                               | -585.76                                                               | -609.53                                                                     |
| 1.20    | -826.41                                                                  | -411.94                                                            | -785.01                                                                     | -553.43                                                                     | -581.14                                                               | -585.31                                                               | -579.27                                                                     |
| 1.25    | -825.47                                                                  | -411.77                                                            | -808.44                                                                     | -569.95                                                                     | -580.85                                                               | -584.90                                                               | -551.59                                                                     |
| 1.30    | -824.71                                                                  | -411.68                                                            | -828.47                                                                     | -584.07                                                                     | -580.61                                                               | -584.58                                                               | -526.65                                                                     |
| 1.35    | -823.99                                                                  | -411.68                                                            | -845.70                                                                     | -596.22                                                                     | -580.45                                                               | -584.26                                                               | -503.89                                                                     |
| 1.40    | -823.50                                                                  | -411.69                                                            | -860.47                                                                     | -606.63                                                                     | -580.19                                                               | -584.00                                                               | -483.49                                                                     |
| 1.45    | -823.05                                                                  | -411.76                                                            | -873.09                                                                     | -615.53                                                                     | -579.99                                                               | -583.76                                                               | -465.17                                                                     |
| 1.46    | -822.98                                                                  | -411.79                                                            | -875.40                                                                     | -617.16                                                                     | -579.89                                                               | -583.70                                                               | -461.29                                                                     |
| 1.47    | -822.90                                                                  | -411.79                                                            | -877.60                                                                     | -618.71                                                                     | -579.91                                                               | -583.67                                                               | -458.43                                                                     |
| 1.50    | -822.64                                                                  | -411.85                                                            | -883.86                                                                     | -623.12                                                                     | -579.76                                                               | -583.53                                                               | -448.28                                                                     |
| 1.55    | -822.33                                                                  | -411.90                                                            | -893.05                                                                     | -629.60                                                                     | -579.60                                                               | -583.40                                                               | -434.50                                                                     |
| 1.60    | -822.09                                                                  | -411.95                                                            | -900.82                                                                     | -635.08                                                                     | -579.37                                                               | -582.95                                                               | -421.64                                                                     |
| 1.65    | -821.87                                                                  | -412.02                                                            | -907.28                                                                     | -639.63                                                                     | -579.18                                                               | -583.10                                                               | -411.04                                                                     |
| 1.70    | -821.70                                                                  | -412.06                                                            | -912.48                                                                     | -643.30                                                                     | -578.93                                                               | -582.69                                                               | -402.53                                                                     |
| 1.75    | -821.44                                                                  | -412.08                                                            | -916.73                                                                     | -646.29                                                                     | -578.86                                                               | -582.82                                                               | -395.30                                                                     |
| 1.80    | -821.33                                                                  | -412.07                                                            | -919.81                                                                     | -648.47                                                                     | -578.47                                                               | -582.70                                                               | -390.08                                                                     |
| 1.85    | -821.19                                                                  | -412.08                                                            | -921.75                                                                     | -649.83                                                                     | -578.25                                                               | -582.30                                                               | -387.25                                                                     |
| 1.90    | -821.16                                                                  | -412.04                                                            | -922.31                                                                     | -650.23                                                                     | -577.77                                                               | -582.31                                                               | -387.06                                                                     |
| 1.95    | -821.04                                                                  | -411.96                                                            | -921.40                                                                     | -649.59                                                                     | -577.32                                                               | -581.98                                                               | -389.57                                                                     |
| 2.00    | -820.87                                                                  | -411.91                                                            | -919.04                                                                     | -647.93                                                                     | -577.25                                                               | -581.89                                                               | -395.50                                                                     |
| 2.10    | -820.72                                                                  | -411.67                                                            | -904.41                                                                     | -637.61                                                                     | -576.97                                                               | -581.72                                                               | -429.95                                                                     |
| 2.20    | -819.52                                                                  | -410.20                                                            | -770.84                                                                     | -543.44                                                                     | -577.85                                                               | -580.38                                                               | -638.49                                                                     |
| 2.30    | -818.54                                                                  | -409.22                                                            | -490.93                                                                     | -346.11                                                                     | -577.21                                                               | -578.78                                                               | -870.95                                                                     |
| 2.40    | -818.11                                                                  | -408.87                                                            | -323.62                                                                     | -228.15                                                                     | -577.12                                                               | -578.78                                                               | -946.19                                                                     |
| 2.50    | -817.86                                                                  | -408.65                                                            | -215.08                                                                     | -151.63                                                                     | -577.49                                                               | -578.48                                                               | -976.73                                                                     |
| 2.60    | -817.62                                                                  | -408.50                                                            | -145.45                                                                     | -102.54                                                                     | -577.52                                                               | -578.26                                                               | -989.56                                                                     |
| 2.70    | -817.49                                                                  | -408.38                                                            | -100.74                                                                     | -71.02                                                                      | -577.52                                                               | -577.68                                                               | -995.18                                                                     |
| 2.80    | -817.45                                                                  | -408.27                                                            | -71.28                                                                      | -50.25                                                                      | -577.48                                                               | -578.63                                                               | -998.13                                                                     |
| 2.90    | -817.37                                                                  | -408.22                                                            | -51.21                                                                      | -36.10                                                                      | -577.47                                                               | -577.86                                                               | -999.06                                                                     |
| 3.00    | -817.30                                                                  | -408.21                                                            | -37.11                                                                      | -26.16                                                                      | -577.51                                                               | -577.80                                                               | -999.82                                                                     |
| 3.20    | -817.25                                                                  | -408.15                                                            | -20.40                                                                      | -14.38                                                                      | -577.50                                                               | -577.70                                                               | -1000.32                                                                    |
| 3.40    | -817.22                                                                  | -408.14                                                            | -11.40                                                                      | -8.04                                                                       | -577.53                                                               | -577.63                                                               | -1000.54                                                                    |
| 3.60    | -817.22                                                                  | -408.15                                                            | -6.64                                                                       | -4.68                                                                       | -577.56                                                               | -577.79                                                               | -1000.71                                                                    |
| 3.80    | -817.22                                                                  | -408.17                                                            | -3.91                                                                       | -2.76                                                                       | -577.58                                                               | -577.56                                                               | -1000.71                                                                    |
| 4.00    | -817.21                                                                  | -408.16                                                            | -2.39                                                                       | -1.68                                                                       | -577.58                                                               | -577.60                                                               | -1000.69                                                                    |
| 4.50    | -817.19                                                                  | -408.13                                                            | 0.74                                                                        | 0.52                                                                        | -577.56                                                               | -577.59                                                               | -1000.70                                                                    |
| 5.00    | -817.19                                                                  | -408.17                                                            | 0.34                                                                        | 0.24                                                                        | -577.61                                                               | -577.53                                                               | -1000.66                                                                    |
| 5.50    | -817.20                                                                  | -408.18                                                            | -0.23                                                                       | -0.16                                                                       | -575.85                                                               | -577.20                                                               | -1001.50                                                                    |
| 6.00    | -817.21                                                                  | -408.18                                                            | -0.14                                                                       | -0.10                                                                       | -573.01                                                               | -577.20                                                               | -1004.28                                                                    |
| 6.50    | -817.22                                                                  | -408.16                                                            | -0.14                                                                       | -0.10                                                                       | -577.85                                                               | -577.64                                                               | -1000.70                                                                    |
| 7.00    | -817.23                                                                  | -408.19                                                            | -0.10                                                                       | -0.07                                                                       | -576.88                                                               | -577.23                                                               | -1000.47                                                                    |
| 7.50    | -817.22                                                                  | -408.18                                                            | -0.13                                                                       | -0.09                                                                       | -579.76                                                               | -577.20                                                               | -1002.24                                                                    |
| 8.00    | -817.22                                                                  | -408.12                                                            | -0.15                                                                       | -0.11                                                                       | -577.99                                                               | -577.10                                                               | -1000.41                                                                    |
| 8.50    | -817.22                                                                  | -408.13                                                            | -0.15                                                                       | -0.10                                                                       | -581.86                                                               | -577.19                                                               | -1003.45                                                                    |
| 9.00    | -817.21                                                                  | -408.15                                                            | -0.07                                                                       | -0.05                                                                       | -582.47                                                               | -583.62                                                               | -997.19                                                                     |

**Table S6**

Spin-orbit matrix elements (in  $\text{cm}^{-1}$ ) for the ground and excited states of CuH.

| $r$ (Å) | $\langle 2^3\Sigma_i^+   \hat{H}_{\text{so}}   1^3\Pi_1 \rangle$ | $\langle X^1\Sigma^+   \hat{H}_{\text{so}}   1^3\Pi \rangle$ | $\langle A^1\Sigma^+   \hat{H}_{\text{so}}   1^3\Pi \rangle$ | $\langle 1^1\Delta   \hat{H}_{\text{so}}   1^3\Delta \rangle$ | $\langle 1^3\Sigma^+   \hat{H}_{\text{so}}   1^1\Pi \rangle$ | $\langle 1^3\Delta   \hat{H}_{\text{so}}   1^1\Pi \rangle$ | $\langle 2^3\Sigma^+   \hat{H}_{\text{so}}   1^1\Pi \rangle$ | $\langle 1^1\Pi   \hat{H}_{\text{so}}   1^3\Pi \rangle$ |
|---------|------------------------------------------------------------------|--------------------------------------------------------------|--------------------------------------------------------------|---------------------------------------------------------------|--------------------------------------------------------------|------------------------------------------------------------|--------------------------------------------------------------|---------------------------------------------------------|
| 1.00    | -503.33                                                          | -428.08                                                      | -640.17                                                      | -831.04                                                       | -465.69                                                      | -592.46                                                    | -491.98                                                      | -410.56                                                 |
| 1.05    | -477.25                                                          | -446.11                                                      | -668.67                                                      | -829.28                                                       | -494.13                                                      | -591.05                                                    | -466.59                                                      | -409.79                                                 |
| 1.10    | -452.67                                                          | -459.32                                                      | -694.31                                                      | -827.73                                                       | -518.96                                                      | -589.14                                                    | -442.72                                                      | -409.21                                                 |
| 1.15    | -429.72                                                          | -468.38                                                      | -717.48                                                      | -826.38                                                       | -540.41                                                      | -588.62                                                    | -420.50                                                      | -408.82                                                 |
| 1.20    | -408.39                                                          | -474.23                                                      | -741.31                                                      | -825.16                                                       | -558.87                                                      | -587.61                                                    | -399.90                                                      | -408.58                                                 |
| 1.25    | -388.87                                                          | -476.86                                                      | -762.45                                                      | -824.08                                                       | -574.61                                                      | -586.67                                                    | -381.11                                                      | -408.43                                                 |
| 1.30    | -371.29                                                          | -477.03                                                      | -783.15                                                      | -823.16                                                       | -588.14                                                      | -585.88                                                    | -364.12                                                      | -408.37                                                 |
| 1.35    | -355.24                                                          | -474.86                                                      | -790.05                                                      | -822.33                                                       | -599.71                                                      | -585.15                                                    | -348.67                                                      | -408.38                                                 |
| 1.40    | -340.86                                                          | -471.09                                                      | -799.20                                                      | -821.64                                                       | -609.54                                                      | -584.49                                                    | -334.90                                                      | -408.43                                                 |
| 1.45    | -327.94                                                          | -466.20                                                      | -808.31                                                      | -821.02                                                       | -617.86                                                      | -583.92                                                    | -322.70                                                      | -408.52                                                 |
| 1.46    | -325.21                                                          | -464.88                                                      | -810.33                                                      | -820.92                                                       | -619.33                                                      | -583.83                                                    | -320.37                                                      | -408.52                                                 |
| 1.47    | -323.20                                                          | -463.86                                                      | -812.54                                                      | -820.81                                                       | -620.86                                                      | -583.24                                                    | -318.19                                                      | -408.56                                                 |
| 1.50    | -316.04                                                          | -460.01                                                      | -818.75                                                      | -820.49                                                       | -624.84                                                      | -583.43                                                    | -311.79                                                      | -408.60                                                 |
| 1.55    | -306.33                                                          | -452.99                                                      | -828.72                                                      | -819.96                                                       | -630.91                                                      | -583.00                                                    | -302.47                                                      | -408.71                                                 |
| 1.60    | -297.25                                                          | -444.29                                                      | -838.46                                                      | -819.48                                                       | -635.98                                                      | -582.61                                                    | -294.20                                                      | -408.78                                                 |
| 1.65    | -289.79                                                          | -435.18                                                      | -847.54                                                      | -819.06                                                       | -640.17                                                      | -582.27                                                    | -287.28                                                      | -408.88                                                 |
| 1.70    | -283.78                                                          | -425.27                                                      | -856.41                                                      | -818.64                                                       | -643.34                                                      | -581.98                                                    | -282.33                                                      | -408.94                                                 |
| 1.75    | -278.69                                                          | -414.74                                                      | -865.29                                                      | -818.59                                                       | -645.84                                                      | -581.68                                                    | -278.68                                                      | -408.99                                                 |
| 1.80    | -275.00                                                          | -403.66                                                      | -873.56                                                      | -817.86                                                       | -647.60                                                      | -581.46                                                    | -276.22                                                      | -408.98                                                 |
| 1.85    | -273.01                                                          | -392.18                                                      | -881.66                                                      | -817.50                                                       | -648.31                                                      | -580.71                                                    | -276.46                                                      | -408.92                                                 |
| 1.90    | -272.87                                                          | -381.38                                                      | -888.77                                                      | -817.93                                                       | -648.30                                                      | -581.01                                                    | -277.80                                                      | -408.86                                                 |
| 1.95    | -274.65                                                          | -370.17                                                      | -895.88                                                      | -817.04                                                       | -647.64                                                      | -580.78                                                    | -280.05                                                      | -408.83                                                 |
| 2.00    | -278.83                                                          | -360.78                                                      | -902.21                                                      | -817.39                                                       | -645.32                                                      | -579.88                                                    | -286.77                                                      | -408.64                                                 |
| 2.10    | -303.11                                                          | -357.90                                                      | -912.43                                                      | -816.43                                                       | -633.99                                                      | -579.85                                                    | -312.52                                                      | -408.64                                                 |
| 2.20    | -450.13                                                          | -325.13                                                      | -942.90                                                      | -817.57                                                       | -540.80                                                      | -578.85                                                    | -454.12                                                      | -408.57                                                 |
| 2.30    | -614.02                                                          | -269.79                                                      | -963.78                                                      | -817.30                                                       | -343.75                                                      | -578.05                                                    | -616.50                                                      | -408.11                                                 |
| 2.40    | -667.07                                                          | -233.47                                                      | -973.72                                                      | -817.13                                                       | -225.91                                                      | -577.78                                                    | -669.10                                                      | -408.02                                                 |
| 2.50    | -688.59                                                          | -202.08                                                      | -980.84                                                      | -817.06                                                       | -149.76                                                      | -577.65                                                    | -690.45                                                      | -407.99                                                 |
| 2.60    | -697.64                                                          | -173.69                                                      | -986.18                                                      | -816.97                                                       | -101.04                                                      | -577.56                                                    | -699.43                                                      | -407.97                                                 |
| 2.70    | -701.60                                                          | -148.02                                                      | -990.21                                                      | -816.96                                                       | -69.83                                                       | -577.10                                                    | -703.43                                                      | -407.97                                                 |
| 2.80    | -703.68                                                          | -125.02                                                      | -993.22                                                      | -817.02                                                       | -49.35                                                       | -576.84                                                    | -705.53                                                      | -407.94                                                 |
| 2.90    | -704.34                                                          | -104.34                                                      | -995.49                                                      | -817.02                                                       | -35.39                                                       | -577.47                                                    | -706.22                                                      | -407.95                                                 |
| 3.00    | -704.87                                                          | -86.01                                                       | -997.17                                                      | -817.02                                                       | -25.59                                                       | -577.51                                                    | -706.75                                                      | -408.01                                                 |
| 3.20    | -705.22                                                          | -56.51                                                       | -999.11                                                      | -817.07                                                       | -14.04                                                       | -577.11                                                    | -707.19                                                      | -408.01                                                 |
| 3.40    | -705.38                                                          | -35.66                                                       | -1000.03                                                     | -817.09                                                       | -7.81                                                        | -577.50                                                    | -707.37                                                      | -408.05                                                 |
| 3.60    | -705.50                                                          | -21.63                                                       | -1000.42                                                     | -817.13                                                       | -4.55                                                        | -577.16                                                    | -707.41                                                      | -408.10                                                 |
| 3.80    | -705.50                                                          | -12.76                                                       | -1000.58                                                     | -817.16                                                       | -2.68                                                        | -577.51                                                    | -707.56                                                      | -408.13                                                 |
| 4.00    | -705.49                                                          | -7.23                                                        | -1000.63                                                     | -817.16                                                       | -1.64                                                        | -577.57                                                    | -707.56                                                      | -408.14                                                 |
| 4.50    | -705.49                                                          | -1.50                                                        | -1000.67                                                     | -817.17                                                       | -0.50                                                        | -577.54                                                    | -707.59                                                      | -408.12                                                 |
| 5.00    | -705.47                                                          | -0.13                                                        | -1000.70                                                     | -817.18                                                       | -0.23                                                        | -577.67                                                    | -707.57                                                      | -408.16                                                 |
| 5.50    | -706.06                                                          | -0.12                                                        | -1001.69                                                     | -817.20                                                       | -0.14                                                        | -577.21                                                    | -708.18                                                      | -408.18                                                 |
| 6.00    | -708.02                                                          | -0.15                                                        | -1003.32                                                     | -817.21                                                       | -0.10                                                        | -577.20                                                    | -710.14                                                      | -408.18                                                 |
| 6.50    | -705.50                                                          | -0.12                                                        | -1000.82                                                     | -817.22                                                       | -0.12                                                        | -577.20                                                    | -707.58                                                      | -408.17                                                 |
| 7.00    | -705.33                                                          | -0.09                                                        | -1000.26                                                     | -817.22                                                       | -0.09                                                        | -577.21                                                    | -707.45                                                      | -408.18                                                 |
| 7.50    | -706.58                                                          | -0.11                                                        | -1001.93                                                     | -817.22                                                       | -0.10                                                        | -577.20                                                    | -706.49                                                      | -408.18                                                 |
| 8.00    | -705.29                                                          | -0.12                                                        | -1000.92                                                     | -817.22                                                       | -0.10                                                        | -577.10                                                    | -707.79                                                      | -408.12                                                 |
| 8.50    | -707.44                                                          | -0.12                                                        | -1003.15                                                     | -817.22                                                       | -0.07                                                        | -577.20                                                    | -709.55                                                      | -408.14                                                 |
| 9.00    | -703.02                                                          | -0.06                                                        | -997.86                                                      | -817.22                                                       | -0.07                                                        | -583.64                                                    | -705.13                                                      | -408.17                                                 |

**Table S7**SOC potential energy curves (in  $\text{cm}^{-1}$ ) for the  $\Omega = 0^+$  and  $0^-$  states of CuH.

| $r$ (Å) | $0^+(\text{I})$ | $0^+(\text{II})$ | $0^+(\text{III})$ | $0^-(\text{I})$ | $0^-(\text{II})$ | $0^-(\text{III})$ |
|---------|-----------------|------------------|-------------------|-----------------|------------------|-------------------|
| 1.00    | 26985.81        | 58669.79         | 70018.19          | 51880.36        | 69980.62         | 95053.31          |
| 1.05    | 19410.31        | 49787.52         | 59602.54          | 43454.10        | 59561.95         | 83137.81          |
| 1.10    | 13573.22        | 42838.50         | 51326.58          | 36873.06        | 51281.81         | 73434.63          |
| 1.15    | 9154.32         | 37385.06         | 44772.91          | 31767.45        | 44723.01         | 65526.14          |
| 1.20    | 5883.64         | 33164.26         | 39635.41          | 27853.05        | 39578.25         | 59063.61          |
| 1.25    | 3520.54         | 29933.62         | 35641.26          | 24897.02        | 35575.25         | 53766.25          |
| 1.30    | 1877.99         | 27515.96         | 32586.05          | 22727.51        | 32508.89         | 49431.30          |
| 1.35    | 823.25          | 25756.95         | 30297.01          | 21186.63        | 30211.41         | 45872.78          |
| 1.40    | 232.64          | 24487.57         | 28629.60          | 20151.38        | 28534.49         | 42943.25          |
| 1.45    | 8.31            | 23725.10         | 27471.90          | 19527.93        | 27362.76         | 40524.12          |
| 1.46    | 0.00            | 23538.13         | 27288.62          | 19444.31        | 27180.44         | 40091.79          |
| 1.47    | 4.84            | 23533.37         | 27131.30          | 19373.66        | 27015.01         | 39677.83          |
| 1.50    | 79.82           | 23311.87         | 26730.75          | 19231.88        | 26604.61         | 38527.45          |
| 1.55    | 388.73          | 23160.53         | 26317.42          | 19193.05        | 26172.99         | 36880.34          |
| 1.60    | 870.78          | 23231.46         | 26176.68          | 19351.28        | 26011.98         | 35390.46          |
| 1.65    | 1493.99         | 23473.57         | 26249.79          | 19659.42        | 26064.17         | 34365.37          |
| 1.70    | 2217.83         | 23853.96         | 26485.24          | 20077.08        | 26275.47         | 33425.78          |
| 1.75    | 3008.29         | 24337.23         | 26857.31          | 20568.88        | 26622.25         | 32659.10          |
| 1.80    | 3870.53         | 24887.04         | 27314.63          | 21113.07        | 27052.12         | 32054.01          |
| 1.90    | 5678.81         | 26177.00         | 28421.96          | 22230.90        | 28079.64         | 31228.13          |
| 2.00    | 7522.37         | 27507.63         | 29664.00          | 23163.67        | 29216.54         | 30928.30          |
| 2.10    | 9329.07         | 28791.87         | 30876.17          | 23661.01        | 30200.41         | 31169.49          |
| 2.20    | 11051.53        | 29937.21         | 32012.89          | 23938.22        | 30756.80         | 32038.41          |
| 2.30    | 12660.07        | 30917.54         | 32988.86          | 23924.85        | 31239.69         | 33033.93          |
| 2.40    | 14129.08        | 31708.29         | 33772.09          | 23746.62        | 31811.81         | 33789.73          |
| 2.50    | 15445.29        | 32312.43         | 34374.22          | 23584.90        | 32343.20         | 34385.54          |
| 2.60    | 16606.79        | 32739.33         | 34805.62          | 23483.20        | 32657.23         | 34768.41          |
| 2.70    | 17609.74        | 33014.46         | 35090.75          | 23237.43        | 32962.92         | 35070.89          |
| 2.80    | 18467.92        | 33201.84         | 35292.12          | 23111.15        | 33144.71         | 35269.43          |
| 2.90    | 19199.53        | 33328.25         | 35424.95          | 22960.31        | 33288.81         | 35409.71          |
| 3.00    | 19811.42        | 33407.58         | 35512.65          | 22846.30        | 33380.32         | 35502.44          |
| 3.20    | 20743.57        | 33511.51         | 35619.18          | 22672.46        | 33485.56         | 35607.64          |
| 3.40    | 21338.99        | 33544.92         | 35652.51          | 22554.47        | 33536.89         | 35649.05          |
| 3.60    | 21706.19        | 33561.55         | 35670.57          | 22474.02        | 33554.42         | 35667.17          |
| 3.80    | 21941.84        | 33557.25         | 35670.84          | 22419.35        | 33557.43         | 35671.05          |
| 4.00    | 22085.57        | 33555.08         | 35671.24          | 22386.97        | 33563.17         | 35675.45          |
| 4.50    | 22250.31        | 33547.58         | 35666.08          | 22349.51        | 33561.65         | 35673.30          |
| 5.00    | 22301.37        | 33557.44         | 35674.33          | 22343.87        | 33574.01         | 35682.86          |
| 5.50    | 22313.84        | 33556.56         | 35674.79          | 22342.34        | 33574.91         | 35684.23          |
| 6.00    | 22318.87        | 33555.04         | 35673.89          | 22339.87        | 33571.76         | 35682.46          |
| 6.50    | 22317.27        | 33551.60         | 35671.59          | 22336.77        | 33568.08         | 35680.01          |
| 7.00    | 22313.00        | 33545.93         | 35666.69          | 22331.50        | 33563.75         | 35675.77          |
| 7.50    | 22315.61        | 33547.87         | 35667.72          | 22335.31        | 33565.42         | 35676.68          |
| 8.00    | 22316.22        | 33551.78         | 35671.73          | 22335.62        | 33568.93         | 35680.49          |
| 8.50    | 22316.26        | 33551.75         | 35671.24          | 22335.86        | 33568.09         | 35679.59          |
| 9.00    | 22316.48        | 33552.76         | 35671.12          | 22335.68        | 33568.30         | 35679.08          |



**Table S8**SOC potential energy curves (in  $\text{cm}^{-1}$ ) for the  $\Omega = 1, 2,$  and  $3$  states of CuH.

| $r$ (Å) | 1(I)     | 1(II)    | 1(III)   | 1(IV)    | 1(V)     | 2(I)     | 2(II)    | 2(III)   | 3(I)     |
|---------|----------|----------|----------|----------|----------|----------|----------|----------|----------|
| 1.00    | 51881.47 | 66736.94 | 69661.67 | 72271.09 | 95053.91 | 65630.62 | 67265.32 | 69495.97 | 65280.96 |
| 1.05    | 43455.78 | 57054.53 | 59296.79 | 61823.54 | 83138.45 | 56025.66 | 57524.95 | 59254.48 | 55668.54 |
| 1.10    | 36875.41 | 49367.10 | 51102.51 | 53491.45 | 73435.29 | 48440.43 | 49693.43 | 51256.48 | 48086.26 |
| 1.15    | 31770.63 | 43241.38 | 44675.08 | 46893.41 | 65526.84 | 42453.52 | 43395.06 | 45056.58 | 42113.33 |
| 1.20    | 27857.20 | 38374.31 | 39704.01 | 41711.20 | 59064.36 | 37749.81 | 38410.33 | 40271.82 | 37444.05 |
| 1.25    | 24902.25 | 34540.35 | 35902.35 | 37674.79 | 53767.05 | 34063.61 | 34558.27 | 36603.87 | 33838.80 |
| 1.30    | 22733.93 | 31571.88 | 33034.24 | 34580.98 | 49432.17 | 31173.20 | 31681.76 | 33826.37 | 31099.44 |
| 1.35    | 21194.33 | 29327.93 | 30901.28 | 32256.07 | 45873.74 | 28952.87 | 29581.85 | 31762.98 | 29053.68 |
| 1.40    | 20160.40 | 27682.34 | 29357.75 | 30550.40 | 42944.32 | 27313.67 | 28081.53 | 30273.99 | 27579.40 |
| 1.45    | 19538.32 | 26529.78 | 28290.63 | 29363.76 | 40525.36 | 26161.73 | 27057.72 | 29250.97 | 26571.13 |
| 1.46    | 19454.97 | 26349.85 | 28124.55 | 29176.85 | 40093.07 | 25981.85 | 26900.20 | 29093.15 | 26415.80 |
| 1.47    | 19384.59 | 26186.24 | 27972.74 | 29007.16 | 39679.14 | 25818.27 | 26756.54 | 28949.83 | 26273.53 |
| 1.50    | 19243.59 | 25780.59 | 27601.09 | 28582.89 | 38528.88 | 25412.81 | 26411.70 | 28605.62 | 25932.60 |
| 1.55    | 19206.07 | 25353.31 | 27215.41 | 28135.15 | 36882.07 | 24985.31 | 26065.41 | 28256.16 | 25592.64 |
| 1.60    | 19365.44 | 25191.97 | 27074.03 | 27951.70 | 35392.64 | 24824.79 | 25958.03 | 28145.31 | 25489.09 |
| 1.65    | 19674.54 | 25238.74 | 27118.42 | 27969.11 | 34368.08 | 24873.76 | 26028.29 | 28219.43 | 25557.47 |
| 1.70    | 20092.99 | 25448.90 | 27332.74 | 28160.23 | 33429.43 | 25085.74 | 26271.99 | 28445.02 | 25812.57 |
| 1.75    | 20585.27 | 25788.23 | 27648.85 | 28461.82 | 32664.26 | 25429.46 | 26602.25 | 28773.54 | 26142.49 |
| 1.80    | 21129.78 | 26213.69 | 28052.34 | 28854.11 | 32061.91 | 25859.67 | 27026.24 | 29189.47 | 26570.51 |
| 1.90    | 22247.35 | 27238.58 | 29010.02 | 29800.20 | 31252.28 | 26896.92 | 28015.73 | 30157.82 | 27570.66 |
| 2.00    | 23177.82 | 28392.62 | 29999.83 | 30743.87 | 31094.42 | 28074.28 | 29068.78 | 31182.10 | 28638.93 |
| 2.10    | 23671.61 | 29506.95 | 30651.40 | 31926.75 | 31409.95 | 29220.55 | 30090.74 | 32169.53 | 29685.74 |
| 2.20    | 23943.88 | 30479.34 | 31058.21 | 32846.71 | 32363.76 | 30275.48 | 30998.85 | 33049.52 | 30625.83 |
| 2.30    | 23926.54 | 31211.37 | 31637.32 | 33645.61 | 33266.31 | 31179.46 | 31754.88 | 33779.20 | 31419.85 |
| 2.40    | 23747.17 | 31831.65 | 32239.40 | 34262.99 | 33957.22 | 31904.67 | 32340.18 | 34347.89 | 32046.85 |
| 2.50    | 23585.09 | 32368.42 | 32719.52 | 34722.82 | 34489.50 | 32458.08 | 32771.09 | 34772.26 | 32518.02 |
| 2.60    | 23483.28 | 32690.24 | 33045.61 | 35032.97 | 34852.01 | 32855.04 | 33072.22 | 35072.92 | 32857.93 |
| 2.70    | 23237.46 | 32991.15 | 33284.57 | 35266.28 | 35128.66 | 33129.32 | 33285.31 | 35289.16 | 33112.80 |
| 2.80    | 23111.16 | 33169.47 | 33439.20 | 35409.61 | 35309.03 | 33316.13 | 33418.75 | 35424.89 | 33272.74 |
| 2.90    | 22960.32 | 33309.29 | 33539.73 | 35507.68 | 35431.23 | 33428.62 | 33506.34 | 35509.70 | 33377.17 |
| 3.00    | 22846.30 | 33396.45 | 33600.35 | 35565.80 | 35508.08 | 33489.08 | 33570.18 | 35560.64 | 33439.51 |
| 3.20    | 22672.46 | 33494.75 | 33671.86 | 35636.07 | 35605.49 | 33562.98 | 33655.95 | 35631.75 | 33531.74 |
| 3.40    | 22554.47 | 33541.60 | 33692.07 | 35662.20 | 35649.23 | 33594.22 | 33683.71 | 35660.43 | 33580.25 |
| 3.60    | 22474.02 | 33555.65 | 33700.59 | 35669.84 | 35664.75 | 33596.74 | 33698.23 | 35665.99 | 33594.41 |
| 3.80    | 22419.35 | 33556.74 | 33700.48 | 35669.92 | 35667.28 | 33594.02 | 33701.21 | 35664.98 | 33597.84 |
| 4.00    | 22386.97 | 33561.47 | 33701.69 | 35673.79 | 35669.96 | 33592.48 | 33703.39 | 35664.64 | 33602.96 |
| 4.50    | 22349.51 | 33559.07 | 33698.11 | 35673.50 | 35666.96 | 33590.01 | 33700.94 | 35662.31 | 33605.02 |
| 5.00    | 22343.87 | 33571.18 | 33705.63 | 35684.28 | 35676.38 | 33601.54 | 33708.79 | 35672.82 | 33617.38 |
| 5.50    | 22342.34 | 33571.64 | 33705.58 | 35683.71 | 35676.18 | 33599.62 | 33709.65 | 35671.75 | 33615.24 |
| 6.00    | 22339.87 | 33568.54 | 33703.93 | 35679.91 | 35673.10 | 33594.67 | 33708.18 | 35667.74 | 33608.36 |
| 6.50    | 22336.77 | 33565.32 | 33703.38 | 35677.44 | 35671.47 | 33592.75 | 33706.86 | 35665.99 | 33605.64 |
| 7.00    | 22331.50 | 33560.68 | 33698.21 | 35672.47 | 35665.53 | 33585.29 | 33702.12 | 35659.33 | 33599.07 |
| 7.50    | 22335.31 | 33562.34 | 33698.78 | 35673.82 | 35667.24 | 33587.73 | 33702.65 | 35661.23 | 33601.89 |
| 8.00    | 22335.62 | 33566.08 | 33703.10 | 35677.50 | 35671.16 | 33590.79 | 33706.53 | 35664.53 | 33604.90 |
| 8.50    | 22335.86 | 33565.40 | 33702.95 | 35677.68 | 35671.90 | 33591.49 | 33706.00 | 35664.89 | 33606.34 |
| 9.00    | 22335.68 | 33565.87 | 33702.41 | 35676.96 | 35671.61 | 33591.79 | 33705.10 | 35664.79 | 33605.26 |

**Table S9**

Vibronic energies (in  $\text{cm}^{-1}$ ) obtained from the SOC-corrected potential energy curves ( $E_{\text{SOC}}$ ) and the eigenvalues ( $E_{\text{Matrix}}$ ) and eigenvectors from diagonalization of the SOC matrix for the  $\Omega = 0^+$  states of CuH.

| State ( $\Omega$ )      | $E_{\text{SOC}}$ | $E_{\text{Matrix}}$ | Exp. [8,17]    | Matrix Eigenvectors                                                                                                                      |
|-------------------------|------------------|---------------------|----------------|------------------------------------------------------------------------------------------------------------------------------------------|
| $0^+(\text{I}) v = 0$   | 0                | 0                   | <b>0</b>       | $X^1\Sigma^+ (1 v=0)$                                                                                                                    |
| $0^+(\text{I}) v = 1$   | 1866             | 1866                | <b>1866.41</b> | $X^1\Sigma^+ (1 v=1)$                                                                                                                    |
| $0^+(\text{I}) v = 2$   | 3654             | 3655                | <b>3658.47</b> | $X^1\Sigma^+ (1 v=2)$                                                                                                                    |
| $0^+(\text{I}) v = 3$   | 5371             | 5373                | <b>5376.85</b> | $X^1\Sigma^+ (1 v=3)$                                                                                                                    |
| $0^+(\text{I}) v = 4$   | 7013             | 7016                | <b>7021.93</b> | $X^1\Sigma^+ (1 v=4)$                                                                                                                    |
| $0^+(\text{I}) v = 5$   | 8582             | 8584                |                | $X^1\Sigma^+ (1 v=5)$                                                                                                                    |
| $0^+(\text{I}) v = 6$   | 10077            | 10080               |                | $X^1\Sigma^+ (1 v=6)$                                                                                                                    |
| $0^+(\text{I}) v = 7$   | 11500            | 11503               |                | $X^1\Sigma^+ (1 v=7)$                                                                                                                    |
| $0^+(\text{I}) v = 8$   | 12847            | 12851               |                | $X^1\Sigma^+ (1 v=8)$                                                                                                                    |
| $0^+(\text{I}) v = 9$   | 14118            | 14122               |                | $X^1\Sigma^+ (1 v=9)$                                                                                                                    |
| $0^+(\text{I}) v = 10$  | 15308            | 15311               |                | $X^1\Sigma^+ (1 v=10)$                                                                                                                   |
| $0^+(\text{II}) v = 0$  | 23039            | 23043               | <b>23311</b>   | $A^1\Sigma^+ (0.95 v=0) + 1^3\Pi (0.5 v=0)$                                                                                              |
| $0^+(\text{II}) v = 1$  | 24667            | 24663               | <b>24922</b>   | $A^1\Sigma^+ (0.94 v=1) + 1^3\Pi (0.3 v=1) + 1^3\Pi (0.3 v=0)$                                                                           |
| $0^+(\text{II}) v = 2$  | 26205            | 26196               | <b>26444</b>   | $A^1\Sigma^+ (0.92 v=2) + 1^3\Pi (0.3 v=1) + 1^3\Pi (0.3 v=2) + A^1\Sigma^+ (0.1 v=1) + A^1\Sigma^+ (0.1 v=3)$                           |
| $0^+(\text{II}) v = 3$  | 27646            | 27648               | <b>27877</b>   | $1^3\Pi (-0.60 v=1) + A^1\Sigma^+ (-0.70 v=3) + A^1\Sigma^+ (0.20 v=1) + 1^3\Pi (0.30 v=2) + 1^3\Pi (0.20 v=3)$                          |
| $0^+(\text{II}) v = 4$  | 28976            | 28965               | <b>29176</b>   | $A^1\Sigma^+ (-0.90 v=4) + A^1\Sigma^+ (-0.20 v=3) + 1^3\Pi (-0.20 v=4) + 1^3\Pi (-0.40 v=3)$                                            |
| $0^+(\text{II}) v = 5$  | 30180            | 30178               | <b>30358</b>   | $A^1\Sigma^+ (0.16 v=4) + A^1\Sigma^+ (0.86 v=5) + 1^3\Pi (-0.4 v=4) + 1^3\Pi (-0.20 v=5)$                                               |
| $0^+(\text{II}) v = 6$  | 31223            | 31243               | <b>31378</b>   | $A^1\Sigma^+ (-0.83 v=6) + A^1\Sigma^+ (-0.18 v=5) + 1^3\Pi (-0.21 v=6) + 1^3\Pi (-0.44 v=5)$                                            |
| $0^+(\text{II}) v = 7$  | 32047            | 32094               |                | $A^1\Sigma^+ (0.20 v=6) + A^1\Sigma^+ (0.78 v=7) + A^1\Sigma^+ (-0.24 v=8) + 1^3\Pi (-0.47 v=6) + 1^3\Pi (-0.23 v=7)$                    |
| $0^+(\text{II}) v = 8$  | 32534            | 32636               |                | $A^1\Sigma^+ (-0.14 v=6) + A^1\Sigma^+ (-0.28 v=7) + A^1\Sigma^+ (-0.79 v=8) + 1^3\Pi (0.10 v=6) + 1^3\Pi (-0.50 v=7)$                   |
| $0^+(\text{III}) v = 0$ | 26035            | 26043               | <b>26282</b>   | $A^1\Sigma^+ (-0.3 v=0) + A^1\Sigma^+ (0.3 v=1) + 1^3\Pi (0.94 v=0)$                                                                     |
| $0^+(\text{III}) v = 1$ | 27617            | 27618               | <b>27844</b>   | $1^3\Pi (0.70 v=1) + A^1\Sigma^+ (-0.60 v=3) + A^1\Sigma^+ (-0.30 v=2) + A^1\Sigma^+ (0.20 v=1) + 1^3\Pi (0.20 v=2) + 1^3\Pi (0.10 v=3)$ |
| $0^+(\text{III}) v = 2$ | 29106            | 29125               | <b>29328</b>   | $A^1\Sigma^+ (0.20 v=2) + A^1\Sigma^+ (-0.30 v=3) + 1^3\Pi (-0.90 v=2) + 1^3\Pi (0.14 v=3)$                                              |
| $0^+(\text{III}) v = 3$ | 30492            | 30512               |                | $A^1\Sigma^+ (0.35 v=4) + A^1\Sigma^+ (-0.23 v=3) + 1^3\Pi (0.14 v=4) + 1^3\Pi (-0.90 v=3)$                                              |
| $0^+(\text{III}) v = 4$ | 31758            | 31777               |                | $A^1\Sigma^+ (0.2 v=4) + A^1\Sigma^+ (-0.4 v=5) + 1^3\Pi (-0.86 v=4) + 1^3\Pi (0.15 v=5)$                                                |

**Table S10**

Vibronic energies (in  $\text{cm}^{-1}$ ) obtained from the SOC-corrected potential energy curves ( $E_{\text{SOC}}$ ) and the eigenvalues ( $E_{\text{Matrix}}$ ) and eigenvectors from diagonalization of the SOC matrix for the  $\Omega = 0^-$  states of CuH.

| State ( $\Omega$ )      | $E_{\text{SOC}}$ | $E_{\text{Matrix}}$ | Exp. | Matrix Eigenvectors                                                                                                                     |
|-------------------------|------------------|---------------------|------|-----------------------------------------------------------------------------------------------------------------------------------------|
| $0^-(\text{I}) v = 0$   | 19055            | 19056               |      | $1^3\Sigma^+ (0.99 v=0) + 1^3\Pi (-0.12 v=0)$                                                                                           |
| $0^-(\text{I}) v = 1$   | 20647            | 20647               |      | $1^3\Sigma^+ (0.99 v=1)$                                                                                                                |
| $0^-(\text{I}) v = 2$   | 22071            | 22072               |      | $1^3\Sigma^+ (0.99 v=2) + 1^3\Pi (0.10 v=2)$                                                                                            |
| $0^-(\text{II}) v = 0$  | 25851            | 25864               |      | $1^3\Pi (0.99 v=0)$                                                                                                                     |
| $0^-(\text{II}) v = 1$  | 27394            | 27404               |      | $1^3\Sigma^+ (0.10 v=1) + 1^3\Pi (-0.98 v=1)$                                                                                           |
| $0^-(\text{II}) v = 2$  | 28813            | 28792               |      | $2^3\Sigma^+ (0.16 v=0) + 1^3\Pi (0.97 v=2)$                                                                                            |
| $0^-(\text{II}) v = 3$  | 30013            | 29935               |      | $2^3\Sigma^+ (0.46 v=0) + 2^3\Sigma^+ (0.14 v=1) + 1^3\Pi (0.85 v=3) + 1^3\Pi (0.12 v=4)$                                               |
| $0^-(\text{III}) v = 0$ | 30641            | 30540               |      | $2^3\Sigma^+ (0.80 v=0) + 1^3\Pi (-0.10 v=2) + 1^3\Pi (-0.50 v=3) + 1^3\Pi (0.27 v=4)$                                                  |
| $0^-(\text{III}) v = 1$ | 31967            | 31980               |      | $2^3\Sigma^+ (0.43 v=1) + 2^3\Sigma^+ (0.35 v=2) + 2^3\Sigma^+ (0.10 v=3) + 1^3\Pi (-0.66 v=4) + 1^3\Pi (0.45 v=5) + 1^3\Pi (0.19 v=6)$ |

**Table S11**

Vibronic energies (in  $\text{cm}^{-1}$ ) obtained from the SOC-corrected potential energy curves ( $E_{\text{SOC}}$ ) and the eigenvalues ( $E_{\text{Matrix}}$ ) and eigenvectors from diagonalization of the SOC matrix for the  $\Omega = 1$  states of CuH.

| State ( $\Omega$ ) | $E_{\text{SOC}}$ | $E_{\text{Matrix}}$ | Exp. [8]     | Matrix Eigenvectors                                                                                                                                                                                                                                                                                                                             |
|--------------------|------------------|---------------------|--------------|-------------------------------------------------------------------------------------------------------------------------------------------------------------------------------------------------------------------------------------------------------------------------------------------------------------------------------------------------|
| 1(I) v = 0         | 19068            | 19068               |              | $1^3\Sigma^+(1 \text{ v}=0)$                                                                                                                                                                                                                                                                                                                    |
| 1(I) v = 1         | 20660            | 20660               |              | $1^3\Sigma^+(1 \text{ v}=1)$                                                                                                                                                                                                                                                                                                                    |
| 1(I) v = 2         | 22085            | 22085               |              | $1^3\Sigma^+(1 \text{ v}=2)$                                                                                                                                                                                                                                                                                                                    |
| 1(II) v = 0        | 25024            | 25169               |              | $1^1\Pi (-0.14 \text{ v}=0) + 1^3\Pi (-0.95 \text{ v}=0) + 1^3\Delta (0.27 \text{ v}=0)$                                                                                                                                                                                                                                                        |
| 1(II) v = 1        | 26560            | 26552               |              | $1^3\Pi (0.14 \text{ v}=1) + 1^1\Pi (0.63 \text{ v}=0) + 1^3\Pi (0.12 \text{ v}=0) + 1^3\Delta (0.75 \text{ v}=0)$                                                                                                                                                                                                                              |
| 1(II) v = 2        | 27994            | 28089               |              | $1^3\Pi (0.13 \text{ v}=0) + 1^1\Pi (-0.35 \text{ v}=0) + 1^3\Pi (0.37 \text{ v}=2) + 1^3\Delta (0.28 \text{ v}=0) + 1^1\Pi (0.52 \text{ v}=1) + 1^3\Delta (0.60 \text{ v}=1)$                                                                                                                                                                  |
| 1(II) v = 3        | 29307            | 29429               |              | $2^3\Sigma^+(-0.17 \text{ v}=0) + 1^3\Pi (0.93 \text{ v}=3) + 1^3\Delta (-0.29 \text{ v}=3)$                                                                                                                                                                                                                                                    |
| 1(III) v = 0       | 26881            | 26716               | <b>27101</b> | $1^1\Pi (0.14 \text{ v}=1) + 1^3\Pi (0.94 \text{ v}=1) + 1^3\Delta (-0.11 \text{ v}=0) + 1^3\Delta (-0.27 \text{ v}=1)$                                                                                                                                                                                                                         |
| 1(III) v = 1       | 28357            | 28151               | <b>28557</b> | $1^1\Pi (-0.23 \text{ v}=1) + 1^1\Pi (0.12 \text{ v}=2) + 1^3\Pi (0.87 \text{ v}=2) + 1^3\Delta (-0.27 \text{ v}=1) + 1^3\Delta (-0.27 \text{ v}=2)$                                                                                                                                                                                            |
| 1(III) v = 2       | 29659            | 29540               | <b>29840</b> | $1^1\Pi (-0.50 \text{ v}=1) + 1^1\Pi (0.50 \text{ v}=2) + 1^3\Pi (0.19 \text{ v}=1) + 1^3\Delta (0.40 \text{ v}=1) + 1^3\Delta (0.54 \text{ v}=2)$                                                                                                                                                                                              |
| 1(III) v = 3       | 30649            | 30918               |              | $2^3\Sigma^+ (0.30 \text{ v}=0) + 1^1\Pi (-0.60 \text{ v}=2) + 1^1\Pi (0.32 \text{ v}=3) + 1^1\Pi (0.11 \text{ v}=4) + 1^3\Pi (0.24 \text{ v}=2) + 1^3\Pi (0.30 \text{ v}=4) + 1^3\Delta (0.48 \text{ v}=2) + 1^3\Delta (0.18 \text{ v}=3)$                                                                                                     |
| 1(IV) v = 0        | 27757            | 27890               | <b>27958</b> | $1^1\Pi (-0.66 \text{ v}=0) + 1^1\Pi (-0.31 \text{ v}=1) + 1^3\Pi (0.23 \text{ v}=0) + 1^3\Delta (0.52 \text{ v}=0) + 1^3\Delta (-0.36 \text{ v}=1)$                                                                                                                                                                                            |
| 1(IV) v = 1        | 29244            | 29280               | <b>29346</b> | $2^3\Sigma^+(-0.14 \text{ v}=0) + 1^1\Pi (-0.54 \text{ v}=1) + 1^1\Pi (-0.45 \text{ v}=2) + 1^3\Pi (0.19 \text{ v}=1) + 1^3\Delta (0.45 \text{ v}=1) + 1^3\Delta (-0.48 \text{ v}=2)$                                                                                                                                                           |
| 1(IV) v = 2        | 30610            | 30563               | <b>30940</b> | $2^3\Sigma^+(-0.19 \text{ v}=1) + 1^1\Pi (0.31 \text{ v}=2) + 1^1\Pi (0.28 \text{ v}=3) + 1^3\Pi (-0.11 \text{ v}=2) + 1^3\Pi (0.73 \text{ v}=4) + 1^3\Delta (-0.25 \text{ v}=2) + 1^3\Delta (0.32 \text{ v}=3) + 1^3\Delta (-0.23 \text{ v}=4)$                                                                                                |
| 1(IV) v = 3        | 31887            | 31878               |              | $2^3\Sigma^+(-0.50 \text{ v}=1) + 2^3\Sigma^+(0.39 \text{ v}=2) + 1^1\Pi (0.42 \text{ v}=4) + 1^3\Pi (-0.16 \text{ v}=5) + 1^3\Pi (-0.16 \text{ v}=6) + 1^3\Delta (0.57 \text{ v}=4) + 1^3\Delta (0.15 \text{ v}=5)$                                                                                                                            |
| 1(V) v = 0         | 30787            | 30728               |              | $2^3\Sigma^+(0.48 \text{ v}=0) + 2^3\Sigma^+(-0.22 \text{ v}=1) + 1^1\Pi (-0.45 \text{ v}=3) + 1^3\Pi (0.37 \text{ v}=4) + 1^3\Delta (-0.57 \text{ v}=3) + 1^3\Delta (-0.16 \text{ v}=4)$                                                                                                                                                       |
| 1(V) v = 1         | 32119            | 32143               |              | $2^3\Sigma^+(-0.20 \text{ v}=1) + 2^3\Sigma^+(0.24 \text{ v}=2) + 2^3\Sigma^+(0.22 \text{ v}=3) + 1^1\Pi (0.57 \text{ v}=3) + 1^1\Pi (-0.30 \text{ v}=4) + 1^3\Pi (-0.24 \text{ v}=3) + 1^3\Pi (-0.29 \text{ v}=6) + 1^3\Pi (-0.12 \text{ v}=7) + 1^3\Delta (-0.48 \text{ v}=3) + 1^3\Delta (-0.15 \text{ v}=4) + 1^3\Delta (0.12 \text{ v}=6)$ |
| 1(V) v = 2         | 33261            | 33193               |              | $2^3\Sigma^+(-0.15 \text{ v}=1) + 2^3\Sigma^+(-0.11 \text{ v}=2) + 1^1\Pi (0.60 \text{ v}=4) + 1^1\Pi (-0.33 \text{ v}=5) + 1^3\Pi (-0.29 \text{ v}=4) + 1^3\Pi (-0.12 \text{ v}=6) + 1^3\Pi (-0.24 \text{ v}=7) + 1^3\Delta (-0.57 \text{ v}=4)$                                                                                               |

**Table S12**

Vibronic energies (in  $\text{cm}^{-1}$ ) obtained from the SOC-corrected potential energy curves ( $E_{\text{SOC}}$ ) and the eigenvalues ( $E_{\text{Matrix}}$ ) and eigenvectors from diagonalization of the SOC matrix for the  $\Omega = 2$  and 3 states of CuH.

| State ( $\Omega$ ) | $E_{\text{SOC}}$ | $E_{\text{Matrix}}$ | Exp. [8]     | Matrix Eigenvectors                                                                       |
|--------------------|------------------|---------------------|--------------|-------------------------------------------------------------------------------------------|
| 2(I) v = 0         | 24660            | 24660               |              | $1^1\Delta (0.11 v=0) + 1^3\Delta (0.31 v=0) + 1^3\Pi (-0.94 v=0)$                        |
| 2(I) v = 1         | 26204            | 26209               |              | $1^1\Delta (-0.11 v=1) + 1^3\Delta (0.32 v=1) + 1^3\Pi (-0.94 v=1)$                       |
| 2(I) v = 2         | 27649            | 27657               |              | $1^1\Delta (0.11 v=2) + 1^3\Delta (0.33 v=2) + 1^3\Pi (-0.93 v=2)$                        |
| 2(I) v = 3         | 28986            | 28994               |              | $1^1\Delta (0.10 v=3) + 1^3\Delta (0.35 v=3) + 1^3\Pi (0.93 v=3)$                         |
| 2(I) v = 4         | 30190            | 30200               |              | $1^3\Delta (0.37 v=4) + 1^3\Pi (-0.92 v=4)$                                               |
| 2(II) v = 0        | 25774            | 25769               |              | $1^1\Delta (0.52 v=0) + 1^3\Delta (0.83 v=0) + 1^3\Pi (0.22 v=0)$                         |
| 2(II) v = 1        | 27269            | 27262               |              | $1^1\Delta (0.57 v=1) + 1^3\Delta (0.82 v=1) + 1^3\Pi (0.22 v=1)$                         |
| 2(II) v = 2        | 28652            | 28646               |              | $1^1\Delta (0.53 v=2) + 1^3\Delta (0.81 v=2) + 1^3\Pi (0.23 v=2)$                         |
| 2(II) v = 3        | 29908            | 29902               |              | $1^1\Delta (0.54 v=3) + 1^1\Delta (0.80 v=3) + 1^3\Pi (0.24 v=3)$                         |
| 2(II) v = 4        | 31012            | 30994               |              | $1^1\Delta (0.55 v=4) + 1^3\Delta (0.75 v=4) + 1^3\Pi (0.24 v=4)$                         |
| 2(III) v = 0       | 27957            | 27956               |              | $1^1\Delta (0.85 v=0) + 1^3\Delta (0.46 v=0) + 1^3\Pi (-0.25 v=0)$                        |
| 2(III) v = 1       | 29439            | 29436               | <b>29725</b> | $1^1\Delta (0.85 v=1) + 1^3\Delta (0.46 v=1) + 1^3\Pi (0.26 v=1)$                         |
| 2(III) v = 2       | 30804            | 30798               |              | $1^1\Delta (0.83 v=2) + 1^3\Delta (0.47 v=2) + 1^3\Pi (0.26 v=2)$                         |
| 2(III) v = 3       | 32036            | 32033               |              | $1^1\Delta (0.82 v=3) + 1^3\Delta (0.47 v=3) + 1^3\Pi (0.27 v=3)$                         |
| 2(III) v = 4       | 33111            | 33107               |              | $1^1\Delta (0.80 v=4) + 1^3\Delta (0.49 v=4) + 1^3\Delta (0.13 v=5) + 1^3\Pi (-0.29 v=4)$ |
| 3(I) v = 0         | 25305            | 25305               |              | $1^3\Delta (1 v=0)$                                                                       |
| 3(I) v = 1         | 26804            | 26804               |              | $1^3\Delta (1 v=1)$                                                                       |
| 3(I) v = 2         | 28193            | 28193               |              | $1^3\Delta (1 v=2)$                                                                       |
| 3(I) v = 3         | 29463            | 29463               |              | $1^3\Delta (1 v=3)$                                                                       |
| 3(I) v = 4         | 30593            | 30593               |              | $1^3\Delta (1 v=4)$                                                                       |
| 3(I) v = 5         | 31542            | 31542               |              | $1^3\Delta (1 v=5)$                                                                       |
| 3(I) v = 6         | 32251            | 32251               |              | $1^3\Delta (1 v=6)$                                                                       |
| 3(I) v = 7         | 32616            | 32616               |              | $1^3\Delta (1 v=7)$                                                                       |

**Table S13**

Vibronic energies (in  $\text{cm}^{-1}$ ) obtained from the SOC-corrected potential energy curves ( $E_{\text{SOC}}$ ) and the eigenvalues ( $E_{\text{Matrix}}$ ) and eigenvectors from diagonalization of the SOC matrix for the  $\Omega = 0^+$  states of CuD.

| State ( $\Omega$ )      | $E_{\text{SOC}}$ | $E_{\text{Matrix}}$ | Exp. [8,17]    | Matrix Eigenvectors                                                                                                                                   |
|-------------------------|------------------|---------------------|----------------|-------------------------------------------------------------------------------------------------------------------------------------------------------|
| $0^+(\text{I}) v = 0$   | 0                | 0                   | <b>0</b>       | $X^1\Sigma^+(1 v=0)$                                                                                                                                  |
| $0^+(\text{I}) v = 1$   | 1347             | 1347                | <b>1346.22</b> | $X^1\Sigma^+(1 v=1)$                                                                                                                                  |
| $0^+(\text{I}) v = 2$   | 2652             | 2653                | <b>2654.45</b> | $X^1\Sigma^+(1 v=2)$                                                                                                                                  |
| $0^+(\text{I}) v = 3$   | 3920             | 3921                | <b>3925.00</b> | $X^1\Sigma^+(1 v=3)$                                                                                                                                  |
| $0^+(\text{I}) v = 4$   | 5152             | 5154                | <b>5158.07</b> | $X^1\Sigma^+(1 v=4)$                                                                                                                                  |
| $0^+(\text{I}) v = 5$   | 6346             | 6348                |                | $X^1\Sigma^+(1 v=5)$                                                                                                                                  |
| $0^+(\text{I}) v = 6$   | 7502             | 7504                |                | $X^1\Sigma^+(1 v=6)$                                                                                                                                  |
| $0^+(\text{I}) v = 7$   | 8621             | 8623                |                | $X^1\Sigma^+(1 v=7)$                                                                                                                                  |
| $0^+(\text{I}) v = 8$   | 9703             | 9705                |                | $X^1\Sigma^+(1 v=8)$                                                                                                                                  |
| $0^+(\text{I}) v = 9$   | 10747            | 10750               |                | $X^1\Sigma^+(1 v=9)$                                                                                                                                  |
| $0^+(\text{I}) v = 10$  | 11755            | 11758               |                | $X^1\Sigma^+(1 v=10)$                                                                                                                                 |
| $0^+(\text{II}) v = 0$  | 23073            | 23075               | <b>23326</b>   | $A^1\Sigma^+(0.98 v=0) + 1^3\Pi(-0.2 v=0)$                                                                                                            |
| $0^+(\text{II}) v = 1$  | 24254            | 24253               | <b>24497</b>   | $A^1\Sigma^+(-0.95 v=1) + 1^3\Pi(0.26 v=1) + 1^3\Pi(0.16 v=0)$                                                                                        |
| $0^+(\text{II}) v = 0$  | 25384            | 25383               | <b>25622</b>   | $A^1\Sigma^+0.94 v=2) + 1^3\Pi(0.22 v=1) + 1^3\Pi(0.23 v=2)$                                                                                          |
| $0^+(\text{II}) v = 1$  | 26470            | 26466               | <b>26700</b>   | $A^1\Sigma^+(0.92 v=3) + 1^3\Pi(-0.27 v=2) + 1^3\Pi(-0.20 v=3)$                                                                                       |
| $0^+(\text{II}) v = 2$  | 27510            | 27505               | <b>27728</b>   | $A^1\Sigma^+(-0.13 v=3) + A^1\Sigma^+(-0.91 v=4) + 1^3\Pi(-0.30 v=3) + 1^3\Pi(-0.18 v=4) + 1^3\Pi(0.10 v=5)$                                          |
| $0^+(\text{II}) v = 3$  | 28498            | 28494               | <b>28701</b>   | $A^1\Sigma^+(-0.15 v=4) + A^1\Sigma^+(-0.90 v=5) + 1^3\Pi(0.34 v=4) + 1^3\Pi(0.16 v=5)$                                                               |
| $0^+(\text{II}) v = 4$  | 29426            | 29429               | <b>29617</b>   | $A^1\Sigma^+(0.19 v=5) + A^1\Sigma^+(0.84 v=6) + A^1\Sigma^+(-0.11 v=7) + 1^3\Pi(0.36 v=5) + 1^3\Pi(0.13 v=6)$                                        |
| $0^+(\text{II}) v = 5$  | 30283            | 30288               |                | $A^1\Sigma^+(0.17 v=6) + A^1\Sigma^+(-0.84 v=7) + A^1\Sigma^+(0.14 v=8) + 1^3\Pi(-0.17 v=4) + 1^3\Pi(0.16 v=5) + 1^3\Pi(0.39 v=6) + 1^3\Pi(0.12 v=7)$ |
| $0^+(\text{III}) v = 0$ | 26075            | 26079               | <b>26297</b>   | $A^1\Sigma^+(-0.27 v=0) + A^1\Sigma^+(0.15 v=1) + 1^3\Pi(0.94 v=0)$                                                                                   |
| $0^+(\text{III}) v = 1$ | 27222            | 27228               | <b>27449</b>   | $A^1\Sigma^+(0.25 v=1) + A^1\Sigma^+(-0.22 v=2) + 1^3\Pi(0.93 v=1)$                                                                                   |
| $0^+(\text{III}) v = 2$ | 28322            | 28329               | <b>28527</b>   | $A^1\Sigma^+(0.23 v=2) + A^1\Sigma^+(-0.26 v=3) + 1^3\Pi(-0.92 v=2) + 1^3\Pi(0.12 v=3)$                                                               |
| $0^+(\text{III}) v = 3$ | 29376            | 29380               |                | $A^1\Sigma^+(-0.19 v=3) + A^1\Sigma^+(0.30 v=4) + 1^3\Pi(-0.87 v=3) + 1^3\Pi(0.17 v=4)$                                                               |

**Table S14**

Vibronic energies (in  $\text{cm}^{-1}$ ) obtained from the SOC-corrected potential energy curves ( $E_{\text{SOC}}$ ) and the eigenvalues ( $E_{\text{Matrix}}$ ) and eigenvectors from diagonalization of the SOC matrix for the  $\Omega = 0^-$  states of CuD.

| State ( $\Omega$ )      | $E_{\text{SOC}}$ | $E_{\text{Matrix}}$ | Exp. | Matrix Eigenvectors                                                                                                 |
|-------------------------|------------------|---------------------|------|---------------------------------------------------------------------------------------------------------------------|
| $0^-(\text{I}) v = 0$   | 19092            | 19093               |      | $1^3\Sigma^+ (-0.99 v=0) + 1^3\Pi (-0.11 v=0)$                                                                      |
| $0^-(\text{I}) v = 1$   | 20254            | 20254               |      | $1^3\Sigma^+ (1 v=1)$                                                                                               |
| $0^-(\text{I}) v = 2$   | 21349            | 21350               |      | $1^3\Sigma^+ (1 v=2)$                                                                                               |
| $0^-(\text{II}) v = 0$  | 25896            | 25909               |      | $1^3\Pi (1 v=0)$                                                                                                    |
| $0^-(\text{II}) v = 1$  | 27019            | 27026               |      | $1^3\Pi (1 v=1)$                                                                                                    |
| $0^-(\text{II}) v = 2$  | 28085            | 28031               |      | $1^3\Pi (1 v=2)$                                                                                                    |
| $0^-(\text{II}) v = 3$  | 29088            | 29005               |      | $2^3\Sigma^+ (0.15 v=0) + 1^3\Pi (0.98 v=3)$                                                                        |
| $0^-(\text{II}) v = 4$  | 29975            | 29894               |      | $2^3\Sigma^+ (-0.34 v=0) + 2^3\Sigma^+ (-0.13 v=1) + 1^3\Pi (-0.92 v=4)$<br>$+ 1^3\Pi (-0.11 v=5)$                  |
| $0^-(\text{III}) v = 0$ | 30722            | 30843               |      | $2^3\Sigma^+ (0.62 v=0) + 2^3\Sigma^+ (-0.49 v=1) + 1^3\Pi (-0.57 v=5)$<br>$+ 1^3\Pi (-0.12 v=6)$                   |
| $0^-(\text{III}) v = 1$ | 31692            | 31700               |      | $2^3\Sigma^+ (0.49 v=1) + 2^3\Sigma^+ (0.34 v=2) + 1^3\Pi (-0.55 v=5)$<br>$+ 1^3\Pi (0.51 v=6) + 1^3\Pi (0.23 v=7)$ |

**Table S15**

Vibronic energies (in  $\text{cm}^{-1}$ ) obtained from the SOC-corrected potential energy curves ( $E_{\text{SOC}}$ ) and the eigenvalues ( $E_{\text{Matrix}}$ ) and eigenvectors from diagonalization of the SOC matrix for the  $\Omega = 1$  states of CuD.

| State ( $\Omega$ ) | $E_{\text{SOC}}$ | $E_{\text{Matrix}}$ | Exp. [8]     | Matrix Eigenvectors                                                                                                                                                                                                                                                             |
|--------------------|------------------|---------------------|--------------|---------------------------------------------------------------------------------------------------------------------------------------------------------------------------------------------------------------------------------------------------------------------------------|
| 1(I) v = 0         | 19105            | 19105               |              | $1^3\Sigma^+ (1 v=0)$                                                                                                                                                                                                                                                           |
| 1(I) v = 1         | 20267            | 20266               |              | $1^3\Sigma^+ (1 v=1)$                                                                                                                                                                                                                                                           |
| 1(I) v = 2         | 21363            | 21363               |              | $1^3\Sigma^+ (1 v=2)$                                                                                                                                                                                                                                                           |
| 1(II) v = 0        | 25071            | 25214               |              | $1^1\Pi (-0.14 v=0) + 1^3\Pi (-0.95 v=0) + 1^3\Delta (0.27 v=0)$                                                                                                                                                                                                                |
| 1(II) v = 1        | 26187            | 26332               |              | $1^1\Pi (0.13 v=1) + 1^3\Pi (0.94 v=1) + 1^3\Delta (-0.27 v=1)$                                                                                                                                                                                                                 |
| 1(II) v = 2        | 27251            | 27378               |              | $1^1\Pi (-0.11 v=2) + 1^3\Pi (-0.95 v=2) + 1^3\Delta (0.27 v=2)$                                                                                                                                                                                                                |
| 1(II) v = 3        | 28265            | 28385               |              | $1^1\Pi (-0.26 v=3) + 1^3\Pi (-0.88 v=3) + 1^3\Delta (-0.35 v=3)$                                                                                                                                                                                                               |
| 1(II) v = 4        | 29216            | 29335               |              | $1^1\Pi (0.10 v=3) + 1^3\Pi (0.95 v=3) + 1^3\Delta (-0.28 v=3)$                                                                                                                                                                                                                 |
| 1(II) v = 5        | 30088            | 30100               |              | $2^3\Sigma^+ (0.23 v=0) + 1^1\Pi (0.27 v=3) + 1^3\Pi (-0.23 v=2) + 1^3\Pi (-0.12 v=5) + 1^3\Delta (-0.52 v=2) + 1^3\Delta (-0.36 v=3)$                                                                                                                                          |
| 1(III) v = 0       | 26936            | 26613               | <b>27149</b> | $1^1\Pi (0.63 v=0) + 1^3\Pi (0.12 v=0) + 1^3\Delta (0.75 v=0)$                                                                                                                                                                                                                  |
| 1(III) v = 1       | 28014            | 28023               | <b>28232</b> | $1^1\Pi (-0.72 v=0) + 1^1\Pi (0.19 v=1) + 1^3\Pi (0.26 v=0) + 1^3\Delta (0.57 v=0) + 1^3\Delta (0.6923 v=1)$                                                                                                                                                                    |
| 1(III) v = 2       | 29028            | 29108               | <b>29256</b> | $1^1\Pi (0.69 v=1) + 1^1\Pi (-0.24 v=2) + 1^3\Pi (-0.25 v=1) + 1^3\Delta (-0.55 v=1) + 1^3\Delta (-0.27 v=2)$                                                                                                                                                                   |
| 1(III) v = 3       | 29934            | 30191               |              | $2^3\Sigma^+ (0.27 v=0) + 1^1\Pi (0.21 v=2) + 1^1\Pi (-0.15 v=3) + 1^3\Pi (-0.86 v=5) + 1^3\Delta (0.28 v=5)$                                                                                                                                                                   |
| 1(IV) v = 0        | 27810            | 27673               | <b>27989</b> | $1^1\Pi (-0.23 v=0) + 1^1\Pi (-0.61 v=1) + 1^3\Pi (-0.12 v=0) + 1^3\Delta (-0.18 v=0) + 1^3\Delta (-0.71 v=1)$                                                                                                                                                                  |
| 1(IV) v = 1        | 28895            | 28675               |              | $1^1\Pi (0.27 v=1) + 1^1\Pi (0.61 v=2) + 1^3\Pi (0.13 v=2) + 1^3\Delta (-0.23 v=1) + 1^3\Delta (0.68 v=2)$                                                                                                                                                                      |
| 1(IV) v = 2        | 29914            | 29613               | <b>30230</b> | $2^3\Sigma^+ (0.17 v=0) + 1^1\Pi (0.61 v=3) + 1^1\Pi (-0.22 v=3) + 1^3\Pi (0.13 v=3) + 1^3\Delta (-0.28 v=2) + 1^3\Delta (0.62 v=3)$                                                                                                                                            |
| 1(IV) v = 3        | 30876            | 30914               |              | $2^3\Sigma^+ (-0.13 v=0) + 2^3\Sigma^+ (0.51 v=1) + 2^3\Sigma^+ (0.24 v=2) + 1^1\Pi (-0.19 v=3) + 1^1\Pi (0.17 v=5) + 1^3\Pi (0.14 v=5) + 1^3\Pi (-0.67 v=6) + 1^3\Pi (-0.15 v=7) + 1^3\Delta (0.17 v=3) + 1^3\Delta (0.25 v=6)$                                                |
| 1(V) v = 0         | 30867            | 30701               |              | $2^3\Sigma^+ (0.64 v=0) + 1^1\Pi (-0.19 v=2) + 1^1\Pi (-0.38 v=4) + 1^1\Pi (0.14 v=5) + 1^3\Pi (0.18 v=5) + 1^3\Delta (-0.58 v=4)$                                                                                                                                              |
| 1(V) v = 1         | 31841            | 31607               |              | $2^3\Sigma^+ (0.49 v=1) + 2^3\Sigma^+ (-0.54 v=2) + 2^3\Sigma^+ (0.20 v=3) + 1^1\Pi (0.18 v=5) + 1^3\Pi (0.44 v=7) + 1^3\Pi (0.16 v=8) + 1^3\Delta (-0.32 v=5)$                                                                                                                 |
| 1(V) v = 2         | 32759            | 32591               |              | $2^3\Sigma^+ (0.15 v=2) + 2^3\Sigma^+ (-0.33 v=3) + 2^3\Sigma^+ (0.29 v=2) + 1^1\Pi (0.23 v=5) + 1^1\Pi (-0.34 v=6) + 1^1\Pi (-0.43 v=7) + 1^1\Pi (0.12 v=8) + 1^3\Pi (-0.43 v=8) + 1^3\Pi (-0.13 v=10) + 1^3\Delta (-0.27 v=5) + 1^3\Delta (-0.29 v=7) + 1^3\Delta (0.11 v=8)$ |
| 1(V) v = 3         | 33526            | 33618               |              | $2^3\Sigma^+ (0.15 v=2) + 2^3\Sigma^+ (0.10 v=5) + 1^1\Pi (-0.11 v=5) + 1^1\Pi (-0.52 v=6) + 1^1\Pi (0.27 v=7) + 1^1\Pi (-0.35 v=8) + 1^3\Pi (0.26 v=6) + 1^3\Pi (-0.28 v=10) + 1^3\Delta (0.52 v=6) + 1^3\Delta (-0.12 v=8) + 1^3\Delta (-0.13 v=9)$                           |



**Table S16**

Vibronic energies (in  $\text{cm}^{-1}$ ) obtained from the SOC-corrected potential energy curves ( $E_{\text{SOC}}$ ) and the eigenvalues ( $E_{\text{Matrix}}$ ) and eigenvectors from diagonalization of the SOC matrix for the  $\Omega = 2$  and 3 states of CuD.

| State ( $\Omega$ ) | $E_{\text{SOC}}$ | $E_{\text{Matrix}}$ | Exp. | Matrix Eigenvectors                                                                                                                     |
|--------------------|------------------|---------------------|------|-----------------------------------------------------------------------------------------------------------------------------------------|
| 2(I) $v = 0$       | 24706            | 24706               |      | $1^1\Delta (0.11 v=0) + 1^3\Delta (-0.31 v=0) + 1^3\Pi (0.95 v=0)$                                                                      |
| 2(I) $v = 1$       | 25827            | 25811               |      | $1^1\Delta (0.36 v=0) + 1^3\Delta (0.61 v=0) + 1^3\Delta (-0.21 v=1) + 1^3\Pi (0.16 v=0) + 1^3\Pi (0.64 v=1)$                           |
| 2(I) $v = 2$       | 26896            | 26885               |      | $1^1\Delta (0.28 v=1) + 1^3\Delta (0.49 v=1) + 1^3\Delta (-0.26 v=2) + 1^3\Pi (0.13 v=1) + 1^3\Pi (0.76 v=2)$                           |
| 2(I) $v = 3$       | 27919            | 27911               |      | $1^1\Delta (0.25 v=2) + 1^3\Delta (0.43 v=2) + 1^3\Delta (0.29 v=3) + 1^3\Pi (0.12 v=2) + 1^3\Pi (0.80 v=3)$                            |
| 2(I) $v = 4$       | 28884            | 28882               |      | $1^1\Delta (0.21 v=3) + 1^3\Delta (0.34 v=3) + 1^3\Delta (0.31 v=4) + 1^3\Pi (0.85 v=4)$                                                |
| 2(II) $v = 0$      | 25827            | 25842               |      | $1^1\Delta (0.36 v=0) + 1^3\Delta (-0.56 v=0) + 1^3\Delta (-0.23 v=1) + 1^3\Pi (-0.14 v=0) + 1^3\Pi (0.69 v=1)$                         |
| 2(II) $v = 1$      | 26914            | 26926               |      | $1^1\Delta (0.43 v=1) + 1^3\Delta (-0.67 v=1) + 1^3\Delta (-0.19 v=2) + 1^3\Pi (-0.18 v=1) + 1^3\Pi (0.55 v=2)$                         |
| 2(II) $v = 2$      | 27947            | 27953               |      | $1^1\Delta (-0.12 v=0) + 1^1\Delta (0.45 v=2) + 1^3\Delta (-0.70 v=2) + 1^3\Delta (-0.17 v=3) + 1^3\Pi (-0.19 v=2) + 1^3\Pi (0.47 v=3)$ |
| 2(II) $v = 3$      | 28921            | 28923               |      | $1^1\Delta (-0.48 v=3) + 1^3\Delta (-0.74 v=3) + 1^3\Delta (-0.15 v=4) + 1^3\Pi (-0.21 v=3) + 1^3\Pi (0.37 v=4)$                        |
| 2(II) $v = 4$      | 29833            | 29830               |      | $1^1\Delta (-0.51 v=4) + 1^3\Delta (-0.77 v=4) + 1^3\Delta (0.12 v=5) + 1^3\Pi (-0.22 v=4) + 1^3\Pi (0.27 v=5)$                         |
| 2(III) $v = 0$     | 28012            | 28013               |      | $1^1\Delta (-0.84 v=0) + 1^3\Delta (0.46 v=0) + 1^3\Pi (0.25 v=0)$                                                                      |
| 2(III) $v = 1$     | 29090            | 29092               |      | $1^1\Delta (-0.85 v=1) + 1^3\Delta (0.46 v=1) + 1^3\Pi (0.25 v=1)$                                                                      |
| 2(III) $v = 2$     | 30113            | 30114               |      | $1^1\Delta (0.84 v=2) + 1^3\Delta (0.46 v=2) + 1^3\Pi (-0.26 v=2)$                                                                      |
| 2(III) $v = 3$     | 31073            | 31075               |      | $1^1\Delta (0.84 v=3) + 1^3\Delta (-0.47 v=3) + 1^3\Pi (-0.26 v=3)$                                                                     |
| 2(III) $v = 4$     | 31968            | 31966               |      | $1^1\Delta (-0.81 v=4) + 1^3\Delta (0.46 v=4) + 1^3\Pi (0.26 v=4)$                                                                      |
| 3(I) $v = 0$       | 25357            | 25357               |      | $1^3\Delta (1 v=0)$                                                                                                                     |
| 3(I) $v = 1$       | 26447            | 26447               |      | $1^3\Delta (1 v=1)$                                                                                                                     |
| 3(I) $v = 2$       | 27482            | 27482               |      | $1^3\Delta (1 v=2)$                                                                                                                     |
| 3(I) $v = 3$       | 28463            | 28463               |      | $1^3\Delta (1 v=3)$                                                                                                                     |
| 3(I) $v = 4$       | 29382            | 29382               |      | $1^3\Delta (1 v=4)$                                                                                                                     |
| 3(I) $v = 5$       | 30234            | 30234               |      | $1^3\Delta (1 v=5)$                                                                                                                     |
| 3(I) $v = 6$       | 31008            | 31008               |      | $1^3\Delta (1 v=6)$                                                                                                                     |
| 3(I) $v = 7$       | 31687            | 31687               |      | $1^3\Delta (1 v=7)$                                                                                                                     |
| 3(I) $v = 8$       | 32250            | 32250               |      | $1^3\Delta (1 v=8)$                                                                                                                     |
| 3(I) $v = 9$       | 32668            | 32668               |      | $1^3\Delta (1 v=9)$                                                                                                                     |
| 3(I) $v = 10$      | 32888            | 32888               |      | $1^3\Delta (1 v=10)$                                                                                                                    |

**Table S17**Spin-orbit matrix elements (in  $\text{cm}^{-1}$ ) between vibrational levels of the  $A^1\Sigma^+$  and  $1^3\Pi$  states of CuH.

$$\langle \psi_{vib,l} | \langle \psi_{el,i} | \hat{H}_{so} | \psi_{el,j} \rangle | \psi_{vib,m} \rangle$$

|          | $A^1\Sigma^+$ |         |         |         |         |         |         |         |        |         |
|----------|---------------|---------|---------|---------|---------|---------|---------|---------|--------|---------|
|          | v = 0         | v = 1   | v = 2   | v = 3   | v = 4   | v = 5   | v = 6   | v = 7   | v = 8  | v = 8   |
| $1^3\Pi$ | v = 0         | -800.73 | 269.20  | -21.38  | -1.33   | -0.62   | -0.36   | 0.01    | 0.23   | 0.20    |
|          | v = 1         | 216.52  | 731.19  | -381.64 | 42.07   | 3.14    | -0.25   | -0.36   | 0.11   | 0.22    |
|          | v = 2         | -73.69  | -287.58 | -655.76 | 471.62  | -58.32  | -6.33   | -2.05   | -0.10  | 0.48    |
|          | v = 3         | 29.75   | 119.36  | 328.10  | 578.16  | -547.71 | 80.66   | 7.20    | 1.75   | 1.55    |
|          | v = 4         | -13.72  | -56.21  | -163.29 | -342.07 | -499.03 | 621.98  | -106.70 | -17.89 | -2.73   |
|          | v = 5         | 6.97    | 29.83   | 85.53   | 193.91  | 335.43  | 412.72  | -696.32 | 127.35 | 37.08   |
|          | v = 6         | -3.89   | -17.16  | -48.22  | -111.89 | -208.81 | -305.42 | -301.59 | 779.02 | -108.88 |
|          | v = 7         | 2.18    | 9.59    | 26.82   | 62.03   | 120.50  | 185.36  | 221.94  | 173.87 | -887.23 |

**Table S18**Spin-orbit matrix elements (in  $\text{cm}^{-1}$ ) between vibrational levels of the  $A^1\Sigma^+$  and  $1^3\Pi$  states of CuD.

$$\langle \psi_{vib,l} | \langle \psi_{el,i} | \hat{H}_{so} | \psi_{el,j} \rangle | \psi_{vib,m} \rangle$$

|          | $A^1\Sigma^+$ |         |         |         |         |         |         |         |         |         |        |
|----------|---------------|---------|---------|---------|---------|---------|---------|---------|---------|---------|--------|
|          | v = 0         | v = 1   | v = 2   | v = 3   | v = 4   | v = 5   | v = 6   | v = 7   | v = 8   | v = 9   | v = 9  |
| $1^3\Pi$ | v = 0         | -785.44 | 305.38  | -42.68  | -0.24   | -0.74   | 0.21    | 0.57    | 0.30    | 0.00    | -0.10  |
|          | v = 1         | 256.34  | 688.29  | -420.35 | 79.86   | -2.49   | -0.07   | 0.40    | -0.39   | -0.69   | -0.28  |
|          | v = 2         | -91.73  | -329.43 | -587.59 | 507.10  | -116.95 | 2.12    | 2.26    | 0.28    | -0.83   | -0.41  |
|          | v = 3         | 36.01   | 144.89  | 369.57  | 484.75  | -572.71 | 147.68  | -0.67   | -0.60   | -1.25   | 0.04   |
|          | v = 4         | -15.13  | -67.39  | -191.62 | -378.10 | -390.08 | 620.59  | -186.52 | 2.80    | -0.93   | 0.11   |
|          | v = 5         | 7.04    | 33.95   | 100.53  | 229.07  | 365.53  | 298.32  | -659.82 | 231.48  | -3.97   | -0.55  |
|          | v = 6         | -3.83   | -18.13  | -56.04  | -132.90 | -248.40 | -340.06 | -208.18 | 692.58  | -281.38 | 0.59   |
|          | v = 7         | 2.46    | 10.31   | 33.11   | 78.80   | 157.71  | 257.95  | 297.37  | 113.64  | -716.26 | 334.79 |
|          | v = 8         | -1.73   | -6.33   | -20.32  | -48.63  | -100.37 | -177.56 | -249.36 | -239.60 | -12.49  | 729.79 |
|          | v = 9         | 1.22    | 4.13    | 12.70   | 30.92   | 64.83   | 118.28  | 184.06  | 217.37  | 156.19  | -86.32 |

**Table S19**Transition dipole moments for the  $\Omega = 0^+(\text{II}), 0^+(\text{III}), 1(\text{I}), 1(\text{II}), 1(\text{III}), 1(\text{IV}),$  and  $1(\text{V})$  states of CuH in Debye (D).

| $r$ (Å) | $0^+(\text{II}) \rightarrow 0^+(\text{I})$ | $0^+(\text{III}) \rightarrow 0^+(\text{I})$ | $1(\text{I}) \rightarrow 0^+(\text{I})$ | $1(\text{II}) \rightarrow 0^+(\text{I})$ | $1(\text{III}) \rightarrow 0^+(\text{I})$ | $1(\text{IV}) \rightarrow 0^+(\text{I})$ | $1(\text{V}) \rightarrow 0^+(\text{I})$ |
|---------|--------------------------------------------|---------------------------------------------|-----------------------------------------|------------------------------------------|-------------------------------------------|------------------------------------------|-----------------------------------------|
| 1.00    | 2.91795                                    | 0.16505                                     | 0.01414                                 | 0.08550                                  | -0.07321                                  | 0.69053                                  | 0.01414                                 |
| 1.05    | 2.74590                                    | 0.18791                                     | 0.01703                                 | 0.10271                                  | -0.06156                                  | 0.69227                                  | 0.01414                                 |
| 1.10    | 2.58130                                    | 0.21267                                     | 0.01975                                 | 0.12321                                  | -0.04183                                  | 0.69255                                  | 0.01414                                 |
| 1.15    | 2.43017                                    | 0.23826                                     | 0.02280                                 | 0.14269                                  | 0.01000                                   | 0.69103                                  | 0.01414                                 |
| 1.20    | 2.26503                                    | 0.26298                                     | 0.02588                                 | 0.15652                                  | 0.03017                                   | 0.68767                                  | 0.01414                                 |
| 1.25    | 2.11088                                    | 0.28721                                     | 0.02915                                 | 0.16374                                  | 0.07490                                   | 0.68162                                  | 0.01449                                 |
| 1.30    | 1.95137                                    | 0.30897                                     | 0.03225                                 | 0.16685                                  | 0.11962                                   | 0.67262                                  | 0.01483                                 |
| 1.35    | 1.90002                                    | 0.34104                                     | 0.03521                                 | 0.16888                                  | 0.16199                                   | 0.66098                                  | 0.01517                                 |
| 1.40    | 1.82594                                    | 0.36643                                     | 0.03821                                 | 0.17097                                  | 0.20487                                   | 0.64502                                  | 0.01612                                 |
| 1.45    | 1.75539                                    | 0.39812                                     | 0.04087                                 | 0.17231                                  | 0.24570                                   | 0.62540                                  | 0.01703                                 |
| 1.46    | 1.74142                                    | 0.39564                                     | 0.04147                                 | 0.17274                                  | 0.25371                                   | 0.62104                                  | 0.01732                                 |
| 1.47    | 1.72191                                    | 0.41095                                     | 0.04195                                 | 0.17315                                  | 0.26083                                   | 0.61690                                  | 0.01761                                 |
| 1.50    | 1.67269                                    | 0.42659                                     | 0.04347                                 | 0.17459                                  | 0.28406                                   | 0.60273                                  | 0.01871                                 |
| 1.55    | 1.59552                                    | 0.45252                                     | 0.04572                                 | 0.17649                                  | 0.31741                                   | 0.57864                                  | 0.02049                                 |
| 1.60    | 1.52204                                    | 0.47556                                     | 0.04775                                 | 0.17872                                  | 0.34383                                   | 0.55456                                  | 0.02345                                 |
| 1.65    | 1.45443                                    | 0.49549                                     | 0.04940                                 | 0.18125                                  | 0.35937                                   | 0.53426                                  | 0.02665                                 |
| 1.70    | 1.38813                                    | 0.51362                                     | 0.05070                                 | 0.18325                                  | 0.38240                                   | 0.50629                                  | 0.03162                                 |
| 1.75    | 1.32538                                    | 0.52690                                     | 0.05167                                 | 0.18566                                  | 0.38839                                   | 0.48808                                  | 0.03873                                 |
| 1.80    | 1.26792                                    | 0.53843                                     | 0.05206                                 | 0.18722                                  | 0.39695                                   | 0.46358                                  | 0.04930                                 |
| 1.90    | 1.15408                                    | 0.56721                                     | 0.05148                                 | 0.18818                                  | 0.40165                                   | 0.41276                                  | 0.09818                                 |
| 2.00    | 1.05586                                    | 0.57074                                     | 0.04785                                 | 0.18724                                  | 0.38324                                   | 0.32419                                  | 0.21640                                 |
| 2.10    | 0.96594                                    | 0.57001                                     | 0.03912                                 | 0.17026                                  | 0.25280                                   | 0.35702                                  | 0.19942                                 |
| 2.20    | 0.67130                                    | 0.42994                                     | 0.02191                                 | 0.09644                                  | 0.18000                                   | 0.24962                                  | 0.15937                                 |
| 2.30    | 0.41076                                    | 0.27968                                     | 0.00949                                 | 0.01414                                  | 0.16100                                   | 0.18871                                  | 0.09241                                 |
| 2.40    | 0.28358                                    | 0.20100                                     | 0.00447                                 | -0.01225                                 | 0.13528                                   | 0.15277                                  | 0.06356                                 |
| 2.50    | 0.18788                                    | 0.13667                                     | 0.00000                                 | -0.01643                                 | 0.11432                                   | 0.12450                                  | 0.03924                                 |
| 2.60    | 0.11870                                    | 0.08729                                     | 0.00000                                 | -0.02530                                 | 0.09257                                   | 0.09975                                  | 0.03435                                 |
| 2.70    | 0.06557                                    | 0.04817                                     | 0.00000                                 | -0.02236                                 | 0.07707                                   | 0.07981                                  | 0.02429                                 |
| 2.80    | 0.02881                                    | 0.02098                                     | 0.00000                                 | -0.02214                                 | 0.06197                                   | 0.06387                                  | 0.01817                                 |
| 2.90    | 0.00447                                    | 0.00316                                     | 0.00000                                 | -0.01975                                 | 0.05060                                   | 0.05225                                  | 0.00949                                 |
| 3.00    | 0.01140                                    | 0.00775                                     | 0.00000                                 | -0.01761                                 | 0.04025                                   | 0.04207                                  | 0.00316                                 |
| 3.20    | 0.02280                                    | 0.01643                                     | 0.00000                                 | -0.01342                                 | 0.02569                                   | 0.02683                                  | 0.00000                                 |
| 3.40    | 0.02098                                    | 0.01517                                     | 0.00000                                 | -0.00949                                 | 0.01612                                   | 0.01703                                  | 0.00000                                 |
| 3.60    | 0.01517                                    | 0.01095                                     | 0.00707                                 | 0.00000                                  | 0.01049                                   | 0.01095                                  | 0.00316                                 |
| 3.80    | 0.00949                                    | 0.00707                                     | 0.00447                                 | 0.00000                                  | 0.00707                                   | 0.00447                                  | 0.00548                                 |
| 4.00    | 0.00548                                    | 0.00316                                     | 0.00548                                 | 0.00000                                  | 0.00447                                   | 0.00000                                  | 0.00447                                 |
| 4.50    | 0.00000                                    | 0.00000                                     | 0.00000                                 | 0.00000                                  | 0.00000                                   | 0.00000                                  | 0.00000                                 |
| 5.00    | 0.00000                                    | 0.00000                                     | 0.00000                                 | 0.00000                                  | 0.00000                                   | 0.00000                                  | 0.00000                                 |
| 5.50    | 0.00000                                    | 0.00000                                     | 0.00000                                 | 0.00000                                  | 0.00000                                   | 0.00000                                  | 0.00000                                 |
| 6.00    | 0.00000                                    | 0.00000                                     | 0.00000                                 | 0.00000                                  | 0.00000                                   | 0.00000                                  | 0.00000                                 |
| 6.50    | 0.00000                                    | 0.00000                                     | 0.00000                                 | 0.00000                                  | 0.00000                                   | 0.00000                                  | 0.00000                                 |
| 7.00    | 0.00000                                    | 0.00000                                     | 0.00000                                 | 0.00000                                  | 0.00000                                   | 0.00000                                  | 0.00000                                 |
| 7.50    | 0.00000                                    | 0.00000                                     | 0.00000                                 | 0.00000                                  | 0.00000                                   | 0.00000                                  | 0.00000                                 |
| 8.00    | 0.00000                                    | 0.00000                                     | 0.00000                                 | 0.00000                                  | 0.00000                                   | 0.00000                                  | 0.00000                                 |
| 8.50    | 0.00000                                    | 0.00000                                     | 0.00000                                 | 0.00000                                  | 0.00000                                   | 0.00000                                  | 0.00000                                 |
| 9.00    | 0.00000                                    | 0.00000                                     | 0.00000                                 | 0.00000                                  | 0.00000                                   | 0.00000                                  | 0.00000                                 |

**Table S20**Einstein  $A$  coefficients ( $A_{v' \rightarrow v''}$  in  $s^{-1}$ ) for the  $0^+(\text{II}) \rightarrow 0^+(\text{I})$  transition of CuH.

|                 |           | $0^+(\text{II})$         |          |          |          |          |          |          |          |          |
|-----------------|-----------|--------------------------|----------|----------|----------|----------|----------|----------|----------|----------|
|                 |           | $A_{v' \rightarrow v''}$ |          |          |          |          |          |          |          |          |
|                 |           | $v' = 0$                 | $v' = 1$ | $v' = 2$ | $v' = 3$ | $v' = 4$ | $v' = 5$ | $v' = 6$ | $v' = 7$ | $v' = 8$ |
| $0^+(\text{I})$ | $v'' = 0$ | 7.82E+06                 | 3.03E+06 | 9.53E+05 | 2.82E+05 | 8.46E+04 | 2.71E+04 | 9.73E+03 | 3.73E+03 | 1.07E+03 |
|                 | $v'' = 1$ | 1.14E+06                 | 3.79E+06 | 3.70E+06 | 1.81E+06 | 7.51E+05 | 3.05E+05 | 1.29E+05 | 5.35E+04 | 1.56E+04 |
|                 | $v'' = 2$ | 2.55E+04                 | 1.74E+06 | 1.54E+06 | 3.16E+06 | 2.26E+06 | 1.24E+06 | 6.29E+05 | 2.91E+05 | 8.91E+04 |
|                 | $v'' = 3$ | 3.78E+01                 | 7.43E+04 | 1.94E+06 | 3.94E+05 | 2.15E+06 | 2.17E+06 | 1.51E+06 | 8.30E+05 | 2.75E+05 |
|                 | $v'' = 4$ | 5.14E+00                 | 2.31E+02 | 1.38E+05 | 1.86E+06 | 6.23E+03 | 1.09E+06 | 1.56E+06 | 1.20E+06 | 4.63E+05 |
|                 | $v'' = 5$ | 1.34E+00                 | 1.59E+01 | 8.91E+02 | 2.22E+05 | 1.48E+06 | 1.72E+05 | 2.78E+05 | 6.77E+05 | 3.57E+05 |
|                 | $v'' = 6$ | 3.03E-01                 | 3.16E+00 | 5.25E+01 | 2.37E+03 | 2.92E+05 | 7.94E+05 | 5.87E+05 | 1.14E+04 | 2.29E+04 |
|                 | $v'' = 7$ | 3.46E-02                 | 8.41E-01 | 3.21E+01 | 7.39E-01 | 1.77E+03 | 2.76E+05 | 1.95E+05 | 5.15E+05 | 1.75E+05 |
|                 | $v'' = 8$ | 3.67E-04                 | 1.40E+00 | 3.06E+00 | 4.29E+02 | 8.89E+02 | 1.08E+03 | 2.10E+05 | 6.96E+00 | 4.30E+04 |

**Table S21**Einstein  $A$  coefficients ( $A_{v' \rightarrow v''}$  in  $s^{-1}$ ) for the  $0^+(\text{III}) \rightarrow 0^+(\text{I})$  transition of CuH.

|                 |           | $0^+(\text{III})$        |          |          |          |          |
|-----------------|-----------|--------------------------|----------|----------|----------|----------|
|                 |           | $A_{v' \rightarrow v''}$ |          |          |          |          |
|                 |           | $v' = 0$                 | $v' = 1$ | $v' = 2$ | $v' = 3$ | $v' = 4$ |
| $0^+(\text{I})$ | $v'' = 0$ | 6.35E+05                 | 2.79E+05 | 9.70E+04 | 3.26E+04 | 1.13E+04 |
|                 | $v'' = 1$ | 4.30E+05                 | 1.22E+05 | 2.31E+05 | 1.45E+05 | 7.09E+04 |
|                 | $v'' = 2$ | 7.51E+04                 | 5.31E+05 | 1.38E+02 | 1.05E+05 | 1.25E+05 |
|                 | $v'' = 3$ | 3.25E+03                 | 1.86E+05 | 4.48E+05 | 5.25E+04 | 1.83E+04 |
|                 | $v'' = 4$ | 1.92E+01                 | 1.36E+04 | 3.01E+05 | 2.71E+05 | 1.51E+05 |
|                 | $v'' = 5$ | 8.87E-01                 | 1.54E+02 | 3.19E+04 | 3.74E+05 | 8.27E+04 |
|                 | $v'' = 6$ | 1.47E-02                 | 2.32E+00 | 3.59E+02 | 5.56E+04 | 3.40E+05 |
|                 | $v'' = 7$ | 7.85E-01                 | 1.87E+00 | 5.39E+01 | 2.37E+02 | 6.57E+04 |
|                 | $v'' = 8$ | 2.62E-01                 | 6.63E-01 | 3.11E+01 | 5.96E+02 | 9.91E+00 |

**Table S22**Einstein  $A$  coefficients ( $A_{v' \rightarrow v''}$  in  $s^{-1}$ ) for the  $1(I) \rightarrow 0^+(I)$  transition of CuH.

|                    |           | 1(I)                     |          |          |
|--------------------|-----------|--------------------------|----------|----------|
|                    |           | $A_{v' \rightarrow v''}$ |          |          |
|                    |           | $v' = 0$                 | $v' = 1$ | $v' = 2$ |
| 0 <sup>+</sup> (I) | $v'' = 0$ | 3.57E+03                 | 3.93E+02 | 3.00E+01 |
|                    | $v'' = 1$ | 6.79E+02                 | 2.39E+03 | 7.58E+02 |
|                    | $v'' = 2$ | 2.22E+01                 | 1.25E+03 | 1.08E+03 |
|                    | $v'' = 3$ | 1.01E-01                 | 8.32E+01 | 1.54E+03 |
|                    | $v'' = 4$ | 3.50E-03                 | 1.44E+00 | 2.34E+02 |
|                    | $v'' = 5$ | 5.76E-05                 | 6.67E-02 | 1.48E+01 |
|                    | $v'' = 6$ | 2.00E-05                 | 8.17E-04 | 1.03E+00 |
|                    | $v'' = 7$ | 2.49E-07                 | 1.14E-03 | 3.34E-04 |
|                    | $v'' = 8$ | 5.55E-06                 | 1.93E-04 | 2.81E-02 |

**Table S23**Einstein  $A$  coefficients ( $A_{v' \rightarrow v''}$  in  $s^{-1}$ ) for the  $1(II) \rightarrow 0^+(I)$  transition of CuH.

|                    |           | 1(II)                    |          |          |          |          |          |          |          |
|--------------------|-----------|--------------------------|----------|----------|----------|----------|----------|----------|----------|
|                    |           | $A_{v' \rightarrow v''}$ |          |          |          |          |          |          |          |
|                    |           | $v' = 0$                 | $v' = 1$ | $v' = 2$ | $v' = 3$ | $v' = 4$ | $v' = 5$ | $v' = 6$ | $v' = 7$ |
| 0 <sup>+</sup> (I) | $v'' = 0$ | 8.32E+04                 | 4.79E+04 | 2.15E+04 | 9.13E+03 | 3.91E+03 | 1.79E+03 | 7.95E+02 | 2.35E+02 |
|                    | $v'' = 1$ | 4.92E+04                 | 1.21E+04 | 3.44E+04 | 2.77E+04 | 1.66E+04 | 9.36E+03 | 4.75E+03 | 1.51E+03 |
|                    | $v'' = 2$ | 8.39E+03                 | 5.59E+04 | 3.38E+02 | 1.18E+04 | 1.85E+04 | 1.59E+04 | 1.01E+04 | 3.55E+03 |
|                    | $v'' = 3$ | 4.45E+02                 | 2.00E+04 | 4.04E+04 | 1.07E+04 | 3.87E+02 | 5.31E+03 | 6.67E+03 | 3.06E+03 |
|                    | $v'' = 4$ | 5.36E+00                 | 1.75E+03 | 2.98E+04 | 1.72E+04 | 2.15E+04 | 3.68E+03 | 5.83E+00 | 1.56E+02 |
|                    | $v'' = 5$ | 1.91E-03                 | 2.89E+01 | 3.91E+03 | 3.11E+04 | 6.23E+02 | 1.71E+04 | 1.18E+04 | 2.98E+03 |
|                    | $v'' = 6$ | 1.17E-02                 | 4.21E-01 | 4.63E+01 | 5.52E+03 | 1.69E+04 | 6.38E+03 | 5.55E+02 | 1.94E+03 |
|                    | $v'' = 7$ | 1.37E-02                 | 1.19E+00 | 2.57E+01 | 8.83E-06 | 4.01E+03 | 2.34E+03 | 7.36E+03 | 2.48E+03 |
|                    | $v'' = 8$ | 3.02E-03                 | 3.72E-01 | 1.63E+01 | 2.29E+02 | 1.29E+02 | 2.16E+03 | 2.37E+01 | 2.55E+02 |

**Table S24**Einstein  $A$  coefficients ( $A_{v' \rightarrow v''}$  in  $s^{-1}$ ) for the  $1(\text{III}) \rightarrow 0^+(\text{I})$  transition of CuH.

|                 |           | 1(III)                   |          |          |          |          |          |          |
|-----------------|-----------|--------------------------|----------|----------|----------|----------|----------|----------|
|                 |           | $A_{v' \rightarrow v''}$ |          |          |          |          |          |          |
|                 |           | $v' = 0$                 | $v' = 1$ | $v' = 2$ | $v' = 3$ | $v' = 4$ | $v' = 5$ | $v' = 6$ |
| $0^+(\text{I})$ | $v'' = 0$ | 3.20E+05                 | 1.20E+05 | 2.74E+04 | 5.96E+03 | 1.50E+03 | 2.20E+02 | 1.97E+01 |
|                 | $v'' = 1$ | 2.68E+05                 | 4.25E+04 | 9.07E+04 | 4.85E+04 | 2.63E+04 | 9.19E+03 | 1.81E+03 |
|                 | $v'' = 2$ | 5.49E+04                 | 2.90E+05 | 7.68E+03 | 1.70E+04 | 3.94E+04 | 2.78E+04 | 7.71E+03 |
|                 | $v'' = 3$ | 2.89E+03                 | 1.29E+05 | 1.54E+05 | 8.97E+04 | 9.53E+03 | 1.88E+03 | 2.61E+03 |
|                 | $v'' = 4$ | 4.89E+01                 | 1.22E+04 | 1.70E+05 | 4.05E+03 | 9.69E+04 | 6.50E+04 | 1.25E+04 |
|                 | $v'' = 5$ | 6.83E-02                 | 2.60E+02 | 3.03E+04 | 8.49E+04 | 4.55E+04 | 1.05E+03 | 6.43E+03 |
|                 | $v'' = 6$ | 1.60E+00                 | 7.45E+00 | 9.44E+02 | 3.81E+04 | 9.74E+03 | 4.19E+04 | 1.15E+04 |
|                 | $v'' = 7$ | 9.30E-02                 | 2.05E+01 | 1.24E+01 | 4.22E+03 | 2.78E+04 | 2.31E+03 | 8.32E+02 |
|                 | $v'' = 8$ | 1.20E-02                 | 2.57E+00 | 5.48E+00 | 4.20E+02 | 8.23E+03 | 6.66E+03 | 4.75E+03 |

**Table S25**Einstein  $A$  coefficients ( $A_{v' \rightarrow v''}$  in  $s^{-1}$ ) for the  $1(\text{IV}) \rightarrow 0^+(\text{I})$  transition of CuH.

|                 |           | 1(IV)                    |          |          |          |          |          |          |
|-----------------|-----------|--------------------------|----------|----------|----------|----------|----------|----------|
|                 |           | $A_{v' \rightarrow v''}$ |          |          |          |          |          |          |
|                 |           | $v' = 0$                 | $v' = 1$ | $v' = 2$ | $v' = 3$ | $v' = 4$ | $v' = 5$ | $v' = 6$ |
| $0^+(\text{I})$ | $v'' = 0$ | 1.12E+06                 | 8.42E+05 | 4.67E+05 | 2.38E+05 | 1.10E+05 | 5.30E+04 | 2.06E+04 |
|                 | $v'' = 1$ | 5.58E+05                 | 8.59E+04 | 4.69E+05 | 5.20E+05 | 3.60E+05 | 2.24E+05 | 1.00E+05 |
|                 | $v'' = 2$ | 7.16E+04                 | 5.25E+05 | 4.31E+04 | 9.18E+04 | 2.50E+05 | 2.62E+05 | 1.49E+05 |
|                 | $v'' = 3$ | 2.60E+03                 | 1.54E+05 | 2.72E+05 | 2.08E+05 | 7.09E+03 | 2.77E+04 | 4.81E+04 |
|                 | $v'' = 4$ | 1.61E+01                 | 9.73E+03 | 1.95E+05 | 7.20E+04 | 2.02E+05 | 9.84E+04 | 2.02E+04 |
|                 | $v'' = 5$ | 9.23E-01                 | 1.09E+02 | 2.22E+04 | 1.92E+05 | 1.17E+02 | 8.66E+04 | 7.43E+04 |
|                 | $v'' = 6$ | 6.70E-02                 | 4.49E+00 | 1.05E+03 | 4.20E+04 | 1.16E+05 | 5.10E+04 | 2.18E+02 |
|                 | $v'' = 7$ | 1.04E+00                 | 2.42E+01 | 1.20E+02 | 2.73E+03 | 4.79E+04 | 1.66E+04 | 3.85E+04 |
|                 | $v'' = 8$ | 5.65E-03                 | 5.79E-02 | 8.47E-01 | 1.45E+00 | 4.14E+03 | 3.41E+04 | 3.69E+03 |

**Table S26**Einstein  $A$  coefficients ( $A_{v' \rightarrow v''}$  in  $s^{-1}$ ) for the  $1(V) \rightarrow 0^+(I)$  transition of CuH.

|           | 1(V)                     |          |          |          |          |          |
|-----------|--------------------------|----------|----------|----------|----------|----------|
|           | $A_{v' \rightarrow v''}$ |          |          |          |          |          |
|           | $v' = 0$                 | $v' = 1$ | $v' = 2$ | $v' = 3$ | $v' = 4$ |          |
| $0^+(I)$  | $v'' = 0$                | 3.89E+03 | 1.17E+04 | 1.46E+04 | 1.22E+04 | 5.40E+03 |
| $v'' = 1$ | 5.72E+04                 | 1.01E+05 | 7.49E+04 | 3.97E+04 | 1.27E+04 |          |
| $v'' = 2$ | 3.51E+05                 | 2.76E+05 | 7.63E+04 | 1.06E+04 | 4.53E+02 |          |
| $v'' = 3$ | 1.17E+06                 | 1.84E+05 | 3.40E+03 | 3.91E+04 | 2.35E+04 |          |
| $v'' = 4$ | 2.31E+06                 | 6.46E+04 | 2.67E+05 | 1.06E+05 | 1.91E+04 |          |
| $v'' = 5$ | 2.71E+06                 | 1.93E+06 | 1.51E+05 | 1.70E+04 | 3.24E+04 |          |
| $v'' = 6$ | 1.83E+06                 | 5.45E+06 | 7.38E+05 | 6.06E+05 | 1.05E+05 |          |
| $v'' = 7$ | 6.39E+05                 | 5.94E+06 | 7.43E+06 | 1.45E+05 | 9.92E+04 |          |
| $v'' = 8$ | 9.50E+04                 | 2.97E+06 | 1.53E+07 | 3.05E+06 | 1.78E+06 |          |

**Table S27**Einstein  $A$  coefficients ( $A_{v' \rightarrow v''}$  in  $s^{-1}$ ) for the  $0^+(II) \rightarrow 0^+(I)$  transition of CuD.

|           | 0 <sup>+(II)</sup>       |          |          |          |          |          |          |          |          |          |
|-----------|--------------------------|----------|----------|----------|----------|----------|----------|----------|----------|----------|
|           | $A_{v' \rightarrow v''}$ |          |          |          |          |          |          |          |          |          |
|           | $v' = 0$                 | $v' = 1$ | $v' = 2$ | $v' = 3$ | $v' = 4$ | $v' = 5$ | $v' = 6$ | $v' = 7$ | $v' = 8$ |          |
| $0^+(I)$  | $v'' = 0$                | 7.16E+06 | 3.39E+06 | 1.20E+06 | 3.69E+05 | 1.04E+05 | 2.95E+04 | 8.92E+03 | 3.16E+03 | 1.40E+03 |
| $v'' = 1$ | 1.79E+06                 | 2.63E+06 | 3.78E+06 | 2.17E+06 | 9.25E+05 | 3.64E+05 | 1.42E+05 | 5.74E+04 | 2.47E+04 |          |
| $v'' = 2$ | 1.09E+05                 | 2.49E+06 | 6.41E+05 | 2.89E+06 | 2.53E+06 | 1.49E+06 | 7.58E+05 | 3.67E+05 | 1.75E+05 |          |
| $v'' = 3$ | 1.51E+03                 | 2.87E+05 | 2.49E+06 | 2.83E+04 | 1.71E+06 | 2.37E+06 | 1.85E+06 | 1.17E+06 | 6.64E+05 |          |
| $v'' = 4$ | 1.94E+01                 | 6.75E+03 | 4.69E+05 | 2.15E+06 | 1.07E+05 | 7.22E+05 | 1.78E+06 | 1.86E+06 | 1.42E+06 |          |
| $v'' = 5$ | 2.32E-02                 | 5.81E+01 | 1.71E+04 | 6.45E+05 | 1.60E+06 | 4.79E+05 | 1.45E+05 | 1.02E+06 | 1.48E+06 |          |
| $v'' = 6$ | 3.00E-01                 | 8.07E-01 | 1.79E+02 | 3.21E+04 | 8.18E+05 | 9.64E+05 | 8.41E+05 | 3.15E+03 | 3.60E+05 |          |
| $v'' = 7$ | 1.67E-01                 | 2.39E-01 | 1.57E-02 | 8.16E+02 | 6.13E+04 | 9.23E+05 | 3.86E+05 | 1.02E+06 | 1.85E+05 |          |
| $v'' = 8$ | 8.62E-03                 | 1.59E-02 | 5.55E+00 | 4.56E+00 | 2.35E+03 | 9.81E+04 | 8.63E+05 | 3.91E+04 | 8.53E+05 |          |

**Table S28**Einstein  $A$  coefficients ( $A_{v' \rightarrow v''}$  in  $s^{-1}$ ) for the  $0^+(\text{III}) \rightarrow 0^+(\text{I})$  transition of CuD.

|                 |           | $0^+(\text{III})$        |          |          |          |          |          |          |          |          |
|-----------------|-----------|--------------------------|----------|----------|----------|----------|----------|----------|----------|----------|
|                 |           | $A_{v' \rightarrow v''}$ |          |          |          |          |          |          |          |          |
|                 |           | $v' = 0$                 | $v' = 1$ | $v' = 2$ | $v' = 3$ | $v' = 4$ | $v' = 5$ | $v' = 6$ | $v' = 7$ | $v' = 8$ |
| $0^+(\text{I})$ | $v'' = 0$ | 5.05E+05                 | 3.19E+05 | 1.44E+05 | 5.78E+04 | 2.23E+04 | 8.56E+03 | 3.24E+03 | 1.22E+03 | 4.65E+02 |
|                 | $v'' = 1$ | 4.79E+05                 | 2.30E+04 | 1.78E+05 | 1.70E+05 | 1.04E+05 | 5.46E+04 | 2.68E+04 | 1.29E+04 | 6.22E+03 |
|                 | $v'' = 2$ | 1.45E+05                 | 4.37E+05 | 3.85E+04 | 3.56E+04 | 1.06E+05 | 1.06E+05 | 7.57E+04 | 4.65E+04 | 2.69E+04 |
|                 | $v'' = 3$ | 1.63E+04                 | 2.99E+05 | 2.45E+05 | 1.41E+05 | 1.02E+03 | 3.31E+04 | 6.90E+04 | 7.00E+04 | 5.40E+04 |
|                 | $v'' = 4$ | 5.74E+02                 | 5.56E+04 | 4.00E+05 | 7.82E+04 | 1.80E+05 | 3.99E+04 | 4.21E+02 | 2.19E+04 | 3.86E+04 |
|                 | $v'' = 5$ | 1.01E+01                 | 3.39E+03 | 1.17E+05 | 4.20E+05 | 2.89E+03 | 1.44E+05 | 8.92E+04 | 1.58E+04 | 1.12E+02 |
|                 | $v'' = 6$ | 2.19E+00                 | 6.69E+01 | 9.99E+03 | 1.88E+05 | 3.52E+05 | 2.45E+04 | 6.82E+04 | 9.98E+04 | 5.04E+04 |
|                 | $v'' = 7$ | 3.54E-01                 | 1.62E+00 | 1.98E+02 | 2.19E+04 | 2.60E+05 | 2.19E+05 | 1.10E+05 | 8.15E+03 | 6.51E+04 |
|                 | $v'' = 8$ | 1.39E-01                 | 1.82E+00 | 7.40E-02 | 6.38E+02 | 4.06E+04 | 2.91E+05 | 7.04E+04 | 1.86E+05 | 1.60E+04 |

**Table S29**Einstein  $A$  coefficients ( $A_{v' \rightarrow v''}$  in  $s^{-1}$ ) for the  $1(\text{I}) \rightarrow 0^+(\text{I})$  transition of CuD.

|                 |           | $1(\text{I})$            |          |          |
|-----------------|-----------|--------------------------|----------|----------|
|                 |           | $A_{v' \rightarrow v''}$ |          |          |
|                 |           | $v' = 0$                 | $v' = 1$ | $v' = 2$ |
| $0^+(\text{I})$ | $v'' = 0$ | 3.37E+03                 | 5.44E+02 | 6.28E+01 |
|                 | $v'' = 1$ | 8.58E+02                 | 2.00E+03 | 9.10E+02 |
|                 | $v'' = 2$ | 5.50E+01                 | 1.48E+03 | 8.98E+02 |
|                 | $v'' = 3$ | 1.02E+00                 | 1.74E+02 | 1.78E+03 |
|                 | $v'' = 4$ | 1.41E-02                 | 6.03E+00 | 3.67E+02 |
|                 | $v'' = 5$ | 5.04E-04                 | 1.63E-01 | 2.44E+01 |
|                 | $v'' = 6$ | 1.91E-06                 | 9.37E-03 | 1.35E+00 |
|                 | $v'' = 7$ | 1.91E-05                 | 1.64E-04 | 1.09E-01 |
|                 | $v'' = 8$ | 8.26E-07                 | 9.80E-06 | 4.85E-03 |



**Table S30**Einstein  $A$  coefficients ( $A_{v' \rightarrow v''}$  in  $s^{-1}$ ) for the  $1(\text{II}) \rightarrow 0^+(\text{I})$  transition of CuD.

|                    |           | 1(II)                    |          |          |          |          |          |          |          |          |
|--------------------|-----------|--------------------------|----------|----------|----------|----------|----------|----------|----------|----------|
|                    |           | $A_{v' \rightarrow v''}$ |          |          |          |          |          |          |          |          |
|                    |           | $v' = 0$                 | $v' = 1$ | $v' = 2$ | $v' = 3$ | $v' = 4$ | $v' = 5$ | $v' = 6$ | $v' = 7$ | $v' = 8$ |
| 0 <sup>+</sup> (I) | $v'' = 0$ | 6.56E+04                 | 5.13E+04 | 2.81E+04 | 1.36E+04 | 6.22E+03 | 2.83E+03 | 1.32E+03 | 6.65E+02 | 3.30E+02 |
|                    | $v'' = 1$ | 5.70E+04                 | 1.44E+03 | 2.40E+04 | 2.95E+04 | 2.22E+04 | 1.39E+04 | 8.00E+03 | 4.70E+03 | 2.60E+03 |
|                    | $v'' = 2$ | 1.70E+04                 | 4.64E+04 | 7.77E+03 | 3.00E+03 | 1.50E+04 | 1.86E+04 | 1.57E+04 | 1.18E+04 | 7.74E+03 |
|                    | $v'' = 3$ | 2.08E+03                 | 3.31E+04 | 2.08E+04 | 2.09E+04 | 1.19E+03 | 2.56E+03 | 8.31E+03 | 1.08E+04 | 9.68E+03 |
|                    | $v'' = 4$ | 1.06E+02                 | 6.87E+03 | 4.03E+04 | 3.56E+03 | 2.15E+04 | 9.00E+03 | 5.60E+02 | 7.53E+02 | 2.95E+03 |
|                    | $v'' = 5$ | 2.29E+00                 | 5.35E+02 | 1.37E+04 | 3.67E+04 | 4.83E+02 | 1.18E+04 | 1.32E+04 | 6.00E+03 | 1.24E+03 |
|                    | $v'' = 6$ | 2.75E-02                 | 1.58E+01 | 1.51E+03 | 2.07E+04 | 2.40E+04 | 8.52E+03 | 1.75E+03 | 9.08E+03 | 8.31E+03 |
|                    | $v'' = 7$ | 2.29E-05                 | 1.12E-01 | 5.67E+01 | 3.20E+03 | 2.48E+04 | 7.42E+03 | 1.78E+04 | 1.65E+03 | 1.29E+03 |
|                    | $v'' = 8$ | 5.98E-04                 | 9.25E-03 | 1.17E-01 | 1.25E+02 | 5.09E+03 | 2.03E+04 | 6.25E+01 | 1.30E+04 | 1.04E+04 |

**Table S31**Einstein  $A$  coefficients ( $A_{v' \rightarrow v''}$  in  $s^{-1}$ ) for the  $1(\text{III}) \rightarrow 0^+(\text{I})$  transition of CuD.

|                    |           | 1(III)                   |          |          |          |          |          |          |          |          |
|--------------------|-----------|--------------------------|----------|----------|----------|----------|----------|----------|----------|----------|
|                    |           | $A_{v' \rightarrow v''}$ |          |          |          |          |          |          |          |          |
|                    |           | $v' = 0$                 | $v' = 1$ | $v' = 2$ | $v' = 3$ | $v' = 4$ | $v' = 5$ | $v' = 6$ | $v' = 7$ | $v' = 8$ |
| 0 <sup>+</sup> (I) | $v'' = 0$ | 2.55E+07                 | 1.45E+05 | 5.03E+04 | 1.34E+04 | 3.64E+03 | 1.23E+03 | 3.19E+02 | 7.62E+01 | 1.76E+01 |
|                    | $v'' = 1$ | 2.85E+05                 | 5.56E+03 | 7.52E+04 | 6.00E+04 | 3.04E+04 | 1.72E+04 | 7.53E+03 | 2.94E+03 | 1.03E+03 |
|                    | $v'' = 2$ | 9.97E+04                 | 2.28E+05 | 3.61E+04 | 6.63E+03 | 2.58E+04 | 3.36E+04 | 2.57E+04 | 1.49E+04 | 6.91E+03 |
|                    | $v'' = 3$ | 1.33E+04                 | 1.93E+05 | 8.95E+04 | 9.34E+04 | 1.49E+04 | 1.21E+02 | 8.93E+03 | 1.40E+04 | 1.04E+04 |
|                    | $v'' = 4$ | 7.66E+02                 | 4.41E+04 | 2.23E+05 | 2.78E+03 | 6.65E+04 | 6.34E+04 | 1.99E+04 | 1.92E+03 | 4.28E+01 |
|                    | $v'' = 5$ | 2.41E+01                 | 3.90E+03 | 8.97E+04 | 1.51E+05 | 4.66E+04 | 4.42E+03 | 4.82E+04 | 4.36E+04 | 1.97E+04 |
|                    | $v'' = 6$ | 7.36E-02                 | 1.99E+02 | 1.22E+04 | 1.22E+05 | 1.56E+04 | 1.05E+05 | 3.18E+04 | 3.54E+02 | 1.01E+04 |
|                    | $v'' = 7$ | 9.92E-02                 | 1.10E+00 | 6.73E+02 | 2.87E+04 | 7.34E+04 | 2.03E+04 | 2.61E+04 | 6.08E+04 | 2.96E+04 |
|                    | $v'' = 8$ | 4.08E-02                 | 4.43E+00 | 4.61E-03 | 2.62E+03 | 3.80E+04 | 1.12E+04 | 4.59E+04 | 4.38E+03 | 3.26E+03 |

**Table S32**Einstein  $A$  coefficients ( $A_{v' \rightarrow v''}$  in  $s^{-1}$ ) for the  $1(IV) \rightarrow 0^+(I)$  transition of CuD.

|                    |           | 1(IV)                    |          |          |          |          |          |          |          |          |
|--------------------|-----------|--------------------------|----------|----------|----------|----------|----------|----------|----------|----------|
|                    |           | $A_{v' \rightarrow v''}$ |          |          |          |          |          |          |          |          |
|                    |           | $v' = 0$                 | $v' = 1$ | $v' = 2$ | $v' = 3$ | $v' = 4$ | $v' = 5$ | $v' = 6$ | $v' = 7$ | $v' = 8$ |
| 0 <sup>+</sup> (I) | $v'' = 0$ | 8.84E+05                 | 8.52E+05 | 5.48E+05 | 3.14E+05 | 1.67E+05 | 8.08E+04 | 4.20E+04 | 2.08E+04 | 1.04E+04 |
|                    | $v'' = 1$ | 6.94E+05                 | 1.80E+03 | 2.87E+05 | 4.80E+05 | 4.54E+05 | 3.15E+05 | 2.09E+05 | 1.23E+05 | 6.91E+04 |
|                    | $v'' = 2$ | 1.78E+05                 | 4.60E+05 | 1.74E+05 | 5.34E+03 | 1.71E+05 | 2.88E+05 | 3.05E+05 | 2.41E+05 | 1.62E+05 |
|                    | $v'' = 3$ | 1.85E+04                 | 3.13E+05 | 1.27E+05 | 3.11E+05 | 7.27E+04 | 4.48E+03 | 7.86E+04 | 1.36E+05 | 1.34E+05 |
|                    | $v'' = 4$ | 8.15E+02                 | 5.79E+04 | 3.15E+05 | 4.04E+02 | 2.20E+05 | 1.91E+05 | 5.02E+04 | 2.72E+02 | 1.01E+04 |
|                    | $v'' = 5$ | 1.58E+01                 | 4.03E+03 | 1.03E+05 | 2.11E+05 | 4.86E+04 | 5.02E+04 | 1.70E+05 | 1.34E+05 | 5.81E+04 |
|                    | $v'' = 6$ | 4.04E-04                 | 6.85E+01 | 1.07E+04 | 1.33E+05 | 9.98E+04 | 1.11E+05 | 1.30E+03 | 3.84E+04 | 7.38E+04 |
|                    | $v'' = 7$ | 6.03E-01                 | 1.89E-01 | 4.28E+02 | 2.26E+04 | 1.47E+05 | 1.96E+04 | 1.25E+05 | 4.59E+04 | 1.76E+03 |
|                    | $v'' = 8$ | 7.11E-02                 | 2.87E+00 | 4.84E+01 | 2.08E+03 | 4.16E+04 | 1.21E+05 | 7.16E+03 | 5.12E+04 | 7.27E+04 |

**Table S33**Einstein  $A$  coefficients ( $A_{v' \rightarrow v''}$  in  $s^{-1}$ ) for the  $1(V) \rightarrow 0^+(I)$  transition of CuD.

|                    |           | 1(V)                     |          |          |          |          |          |          |
|--------------------|-----------|--------------------------|----------|----------|----------|----------|----------|----------|
|                    |           | $A_{v' \rightarrow v''}$ |          |          |          |          |          |          |
|                    |           | $v' = 0$                 | $v' = 1$ | $v' = 2$ | $v' = 3$ | $v' = 4$ | $v' = 5$ | $v' = 6$ |
| 0 <sup>+</sup> (I) | $v'' = 0$ | 2.76E+02                 | 1.50E+03 | 3.64E+03 | 5.30E+03 | 5.68E+03 | 4.60E+03 | 2.15E+03 |
|                    | $v'' = 1$ | 5.24E+03                 | 2.01E+04 | 3.39E+04 | 3.53E+04 | 2.77E+04 | 1.73E+04 | 6.81E+03 |
|                    | $v'' = 2$ | 4.40E+04                 | 1.08E+05 | 1.11E+05 | 6.84E+04 | 3.01E+04 | 1.03E+04 | 2.49E+03 |
|                    | $v'' = 3$ | 2.15E+05                 | 2.84E+05 | 1.28E+05 | 2.19E+04 | 1.83E+01 | 3.46E+03 | 3.28E+03 |
|                    | $v'' = 4$ | 6.76E+05                 | 3.34E+05 | 1.14E+04 | 2.62E+04 | 5.23E+04 | 3.67E+04 | 1.34E+04 |
|                    | $v'' = 5$ | 1.44E+06                 | 6.65E+04 | 1.27E+05 | 1.54E+05 | 4.99E+04 | 5.55E+03 | 3.83E+01 |
|                    | $v'' = 6$ | 2.09E+06                 | 2.27E+05 | 3.97E+05 | 3.18E+04 | 1.74E+04 | 4.58E+04 | 2.48E+04 |
|                    | $v'' = 7$ | 2.04E+06                 | 1.87E+06 | 5.07E+04 | 1.74E+05 | 1.73E+05 | 5.63E+04 | 9.23E+03 |
|                    | $v'' = 8$ | 1.29E+06                 | 3.80E+06 | 8.42E+05 | 4.62E+05 | 3.05E+03 | 3.92E+04 | 3.33E+04 |

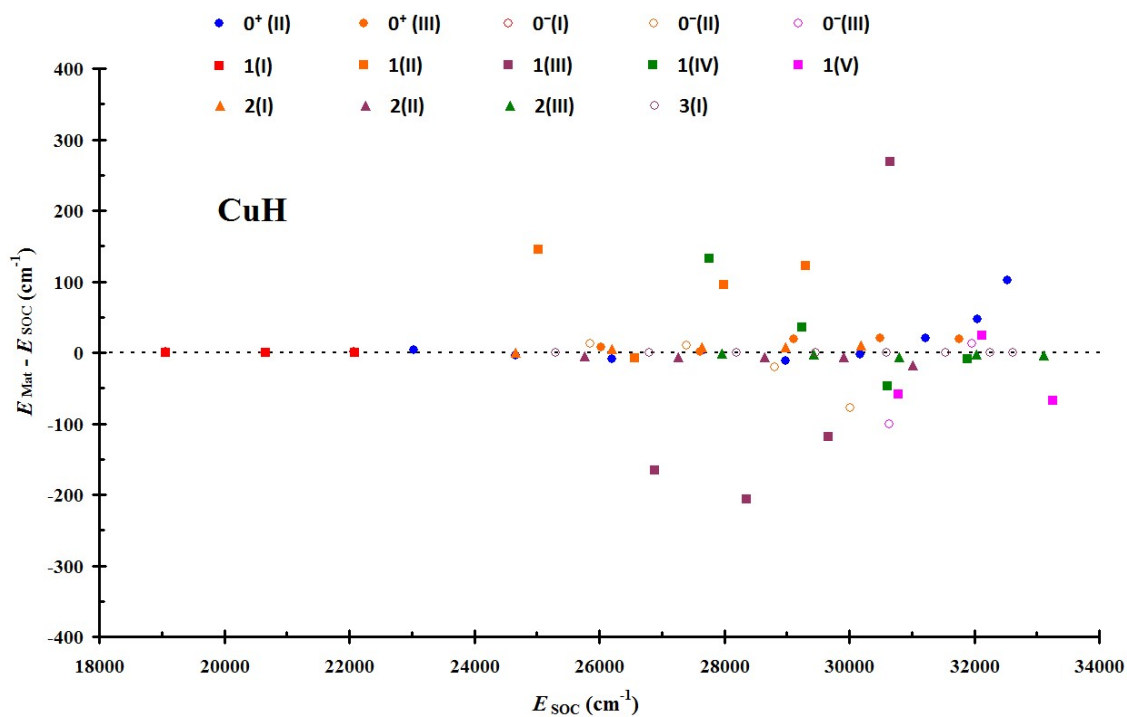

**Figure S1.** The differences in vibronic energies calculated by two different SOC methods for CuH.

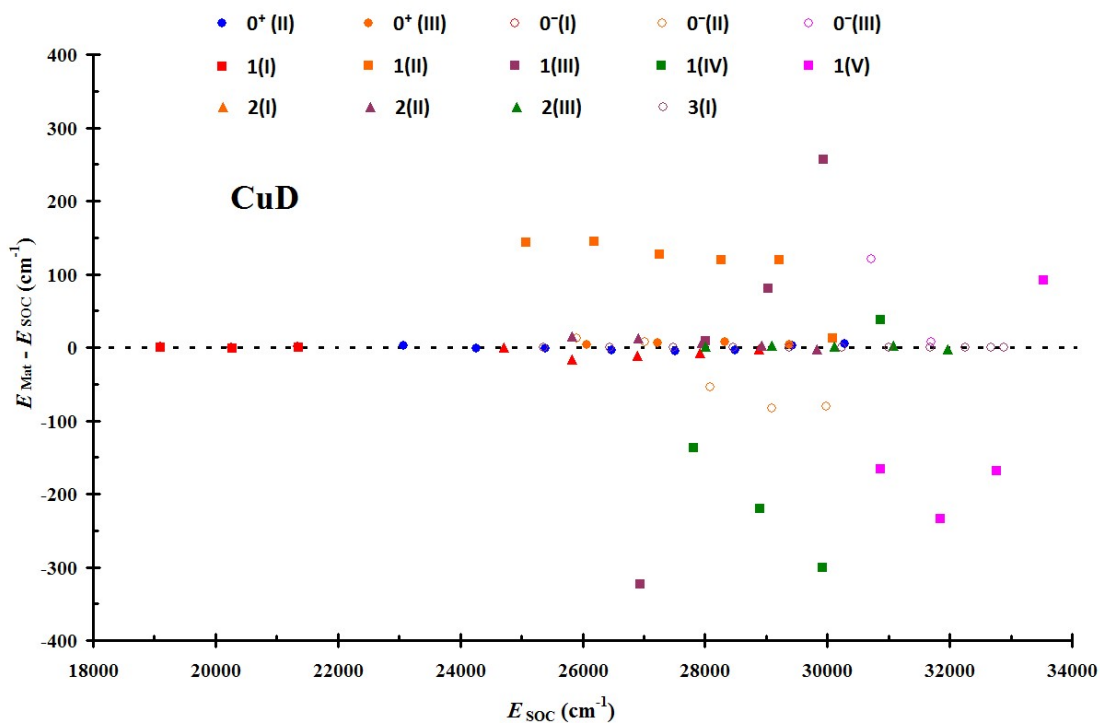

**Figure S2.** The differences in vibronic energies calculated by two different SOC methods for CuD.
